# Supplementary material
Source: PubMed Central journal article supplement (PMC6172604)

## Supplementary Information

### Supplementary Methods

#### SEPT2 and AKAP8 shRNA constructs

Lentiviral shRNA vectors (pLKO.1 backbone) targeting *AKAP8* (TRCN0000218647 and TRCN0000229896, denoted as sh-A and sh-B respectively) and *SEPT2* (TRCN0000062153 and TRCN0000062154, denoted as sh-C and sh-D respectively) were obtained from Mission Sigma.

#### Real-Time Quantitative Polymerase Chain Reaction

The knockdown confirmation of *AKAP8* and *SEPT2* was performed by measuring the mRNA expression level by real-time quantitative PCR. Reactions were performed on LightCycler 96 Real-Time PCR system (Roche) using TaqMan assay probes (*AKAP8*: Hs00935915\_m1; *SEPT2*: Hs01565417\_m1) obtained from ThermoFisher Scientific. *B2M* ( $\beta$ 2-microglobulin) was used as endogenous control (Hs99999907\_m1, ThermoFisher Scientific) and relative mRNA expression levels were calculated by using  $\Delta\Delta C_T$  method.

#### Cell Growth Assay

On day 7 of culture, transduced cells were seeded in 96 well plates (2000 cells). Cell viability was assessed by using CellTiter-Glo® Luminescent Cell Viability Assay (Promega) from day 7 to day 13 of differentiation. Luminescent signal was detected using a SpectraMax i3x plate reader (molecular devices).

#### Flow Cytometry

Erythroid differentiation on day 11 and day 14 was evaluated using flow cytometry. Differentiation of erythroid cells was assessed by using antibodies against CD36 (PE anti-human CD36, clone 5-271, Biolegend), CD71 (PE-Cyanine7, clone OTK-9, eBiosciences) and CD235a (APC, clone HIR2, eBiosciences). DAPI (Sigma Aldrich) was used as viability dye. Cells were incubated with antibodies for 30 mins at 4°C in dark. Further, cells were washed with FACS buffer (PBS with 1% Bovine serum albumin) and resuspended in FACS buffer with DAPI for flow cytometry analysis. DAPI negative (viable) cells were used for subsequent analysis.

Cell cycle analysis was performed on ethanol-fixed cells. Fixed cells were washed with PBS and treated with RNase (40µg/ml) and PI (10µg/ml) for 30 mins at room temperature. Cell cycle analysis using Flow cytometry.

All flow cytometry was performed using an LSRII flow cytometer (BD Biosciences) and data analyzed by using FlowJO VX software.

#### Colony-Forming Cell Assay

Colony-forming cell assay was performed by plating 3000 transduced cells on day 7 of differentiation on methylcellulose (MethoCult H4434 Classic, Stemcell Technologies) containing 0.65µg/ml puromycin according to the manufacturer's protocol. Plates were incubated in a humidified incubator at 37°C and 5% CO<sub>2</sub>. Colonies were counted after 14 days of incubation.

#### Hierarchical clustering using aberrantly spliced events identified in SFmut MDS

Hierarchical clustering was performed using rMATS-calculated inclusion levels of the 245, 236 and 287 aberrantly spliced events identified in *SF3B1*mut, *SRSF2*mut and *U2AF1*mut MDS cases. Hierarchical clustering heatmap plots were generated using the ClustVis tool (<https://biit.cs.ut.ee/clustvis/>).

#### Annotation of NMD sensitive and insensitive aberrantly spliced events identified in SFmut MDS

rMATS output files were converted to bed files using the DASEResultConvertor.jar tool available from the Alternative Splicing Encyclopedia (ASpedia; <http://combio.snu.ac.kr/aspedia/>). Bed files were subsequently used to map splicing events to Ensembl transcript ID using the multiple AS event query in ASpedia. Finally, transcript IDs were annotated as NMD sensitive or insensitive using the Ensembl BioMart tool (<https://www.ensembl.org/biomart/martview>).

#### Gene Ontology Analysis

To identify splicing factor mutant specific effects, we investigated the overlapping significant GO themes for each of the splicing factor (*SF3B1*, *SRSF2* and *U2AF1*) mutant MDS versus healthy controls, and versus splicing factor wildtype MDS.

REVIGO (<http://revigo.irb.hr/>)<sup>1</sup>, which removes redundant GO terms, treemap function was used to visualize the important biological process (BP) ontology themes affected by the splicing factor mutations.

#### Analysis of genes involved in heme metabolism and iron processing

For the investigation of aberrantly spliced genes involved in heme metabolism and iron processing in SFmut MDS, a total of 200 genes involved in heme metabolism and 150 genes involved in iron homeostasis and transport were analyzed. The lists of genes were obtained from relevant gene sets within the Molecular Signatures Database (MSigDB; <http://software.broadinstitute.org/gsea/msigdb/index.jsp>). Specifically, for the genes involved in heme metabolism, the HALLMARK\_HEME\_METABOLISM gene set was used. For the genes involved in iron homeostasis and transport, genes from Lane et al (2015)<sup>2</sup> and from the following gene sets were used: GO\_CELLULAR\_IRON\_ION\_HOMEOSTASIS, GO\_IRON\_COORDINATION\_ENTITY\_TRANSPORT, GO\_IRON\_ION\_IMPORT, GO\_IRON\_ION\_TRANSPORT, and GO\_IRON\_ION\_HOMEOSTASIS.

#### Clinical association of splicing factor mutation status in MDS

To identify the respective association of splicing factor mutations with continuous (hemoglobin, Hb; white blood cell counts, WBC; absolute neutrophil count, ANC; platelet count, Plt; BM blasts; and age) and categorical (gender, IPSS and transfusion dependency) clinical variables, a two-tailed Mann-Whitney non-parametric test and Fisher's exact test was performed.

#### Pathway analysis heatmaps

We investigated the overlapping significant pathways for each of the splicing factor (*SF3B1*, *SRSF2* and *U2AF1*) mutant MDS versus healthy controls, and versus splicing factor wildtype MDS. Significant pathways were determined by a  $-\log p\text{-value} \geq 1.3$  ( $p\text{-value} < 0.05$ ). Heatmaps from collapsed IPA-generated  $-\log p\text{-values}$  were created using using R (<http://www.R-project.org>) and graphical CRAN package pheatmap (<https://cran.r-project.org/package=pheatmap>). Values were collapsed by the comparison (vs Healthy control or vs SFWT) that had the lowest  $-\log p\text{-values}$  (highest p value) and only significant values were plotted. To identify the converging pathways with the lowest p-value across all the splicing factor mutant MDS (*SF3B1*, *SRSF2* and *U2AF1*), pathways were ranked by the

minimum enrichment -log p-values (highest p value) identified in the *SF3B1*, *SRSF2* and *U2AF1* mutant MDS IPA analysis.

### Bioinformatics analysis

Computational analysis and statistical testing was conducted using the R statistical programming language (<http://www.R-project.org>), with the following packages used: ggplot2 (<https://cran.r-project.org/package=ggplot2>), survminer (<https://cran.r-project.org/package=survminer>), biomaRt,<sup>3</sup> RWebLogo (<https://github.com/omarwagih/RWebLogo>), DESeq2<sup>4</sup> and UpSetR.<sup>5</sup>

### AKAP8 and SEPT2 downregulation splicing factor mutant MDS

Down-regulation of *AKAP8* in *SRSF2* mutant MDS, and *SEPT2* in *SF3B1* mutant MDS was determined using the R language Bioconductor package DESeq2. Differential expression was determined using the default Wald test and adjusted for multiple hypothesis testing using Benjamini-Hochberg correction across all genes tested. Specific gene expression boxplots for *AKAP8* and *SEPT2* expression were generated using ggplot2.

### Validation of aberrant splicing events identified using semi-quantitative PCR

Total RNA was extracted using TRIzol (Thermo Scientific, UK) with a linear acrylamide carrier, treated with DNase I (Life technologies) and purified using Agencourt RNAClean XP beads (Beckman Coulter). DNase-free RNA was converted to cDNA using a High-Capacity cDNA Reverse Transcription Kit (Thermo-Fisher). Long and short isoforms of *AKAP8*, *SEPT2*, *PFKM* and *METTL17* were amplified using primers flanking the region of interest in a PCR reaction using maxima hotstart PCR mastermix (Thermo-Fisher). PCR products were separated using DNA 1000 chips (Agilent). PCR long:short ratios were calculated using band intensities as quantified by the 2100 Expert software (Agilent). Statistical significance was determined by Kruskal-Wallis one-way analysis of variance followed by Dunn's post hoc test. Primers used are presented in the Table below:

| Gene         | Primer direction | Sequence (5'-3')        |
|--------------|------------------|-------------------------|
| <i>SEPT2</i> | Forward          | GAGTCATACCTGGAGCAGCA    |
|              | Reverse          | TAGCTTGACCCCTCGCTCTT    |
| <i>AKAP8</i> | Forward          | AGGGTGAGGATGAACTCTGC    |
|              | Reverse          | GCATACAGAACAGGCAAACCTGA |

|                |         |                       |
|----------------|---------|-----------------------|
| <i>PFKM</i>    | Forward | ATCATTGTGGCTGAGGGTGC  |
|                | Reverse | TCCCCTCCAAAAGTGCCATC  |
| <i>METTL17</i> | Forward | TCAGGTGCAAACACTGACCA  |
|                | Reverse | TGCTCCACGAAGTTTCTCCTC |

### Analysis of 3' splice site and RI properties

For analysis of 3' splice site (ss) properties, we collected data sets from the A3SS rMATS output on the basis of FDR <0.05. For events with IncLevelDifference >0.1 (>0.15 in the case of *SF3B1* mutant analysis) the upstream A3SS was classified as cryptic and the downstream A3SS as associated canonical A3SS. Likewise, for events IncLevelDifference <-0.1 (<-0.15 in the case of *SF3B1* mutant analysis), the downstream A3SS was classified as cryptic A3SS and the upstream one associated canonical.

Human sequences around A3SS and upstream introns were retrieved from UCSC (hg19, Feb. 2009) using R and the Bioconductor packages: Genomic Ranges, Genomic Features, biomaRt and BSgenome.Hsapiens.UCSC.hg19. Graphical outputs were generated ggplot2. Statistical analysis comparing sequences properties between data sets were done using Two-tailed Mann-Whitney test in R.

Sequence logos were produced using RWebLogo. For that 35nt upstream and 3nt downstream were extracted for each A3SS as mentioned above and used as input for the program.

Density plots: For each pair of A3SS, the distance between was calculated as the difference of its chromosomal coordinates, and the log<sub>2</sub> of the difference was plot using density plot in ggplot2.

### Survival effects of isoform expression

MDS: Kaplan-Meier survival curves were constructed using the surviner and survival packages in R. Statistical testing of differences between survival curves used Cox proportional hazards multivariate modelling. Initial exploratory survival analysis used a full dataset with covariates including splice factor mutation status, karyotype and confounding mutations – none of these covariates were identified as statistically significant and a minimal model was used for definitive testing with age, gender, IPSS, and isoform expression high or low (median split) as covariates.

TCGA: We analyzed expression levels of isoforms in the publicly available RNA sequencing data generated by the TCGA Research Network (<http://cancergenome.nih.gov/>). Filtered and

log 2 normalized RNA isoform expression data along with all available clinical data were downloaded from the GDAC firehose database (run: stddata\_\_2015\_06\_01) for each gene of interest from the AML dataset. Survival analysis was performed using the survminer and survival R packages. Kaplan-Meier estimated survival curves were constructed using the TCGA clinical data. Statistical testing of differences between survival curves used Cox proportional hazards modelling as above.

### Supplementary References

1. Supek, F., Bosnjak, M., Skunca, N. & Smuc, T. REVIGO summarizes and visualizes long lists of gene ontology terms. *PLoS One* **6**, e21800 (2011).
2. Lane, D.J., Merlot, A.M., Huang, M.L., Bae, D.H., Jansson, P.J., Sahni, S., Kalinowski, D.S. & Richardson D.R. Cellular iron uptake, trafficking and metabolism: Key molecules and mechanisms and their roles in disease. *Biochim Biophys Acta* **1853**, 1130-1144 (2015).
3. Durinck, S., Spellman, P.T., Birney, E. & Huber, W. Mapping identifiers for the integration of genomic datasets with the R/Bioconductor package biomaRt. *Nat Protoc* **4**, 1184-1191 (2009).
4. Love, M.I., Huber, W. & Anders, S. Moderated estimation of fold change and dispersion for RNA-seq data with DESeq2. *Genome Biol* **15**, 550 (2014).
5. Conway, J.R., Lex, A. & Gehlenborg, N. UpSetR: an R package for the visualization of intersecting sets and their properties. *Bioinformatics* **33**, 2938-2940 (2017).



Table S2: The splicing factor mutations identified in the CD34+ MDS cohort.

| ID   | Specific Splicing factor Mutations in cohort |                    |       |           |
|------|----------------------------------------------|--------------------|-------|-----------|
|      | SF3B1                                        | SRSF2              | U2AF1 | ZRSR2     |
| A153 | E622D                                        |                    |       |           |
| A142 | E622D                                        |                    |       |           |
| A190 | E622D                                        |                    |       |           |
| A178 | E622D                                        |                    |       |           |
| A166 | H662Q                                        |                    |       |           |
| A123 | H662Q                                        |                    |       |           |
| A205 | K666N                                        |                    |       |           |
| A172 | K700E                                        |                    |       |           |
| A199 | K700E                                        |                    |       |           |
| A118 | K700E                                        |                    |       |           |
| A149 | K700E                                        |                    |       |           |
| A125 | K700E                                        |                    |       |           |
| A127 | K700E                                        |                    |       |           |
| A116 | K700E                                        |                    |       |           |
| A150 | K700E                                        |                    |       |           |
| A185 | K700E                                        |                    |       |           |
| A128 | K700E                                        |                    |       |           |
| A147 | K700E                                        |                    |       |           |
| A181 | K700E                                        |                    |       |           |
| A170 | K700E                                        |                    |       |           |
| A158 | K700E                                        |                    |       |           |
| A197 | K700E                                        |                    |       |           |
| A112 | K700E                                        |                    |       |           |
| A196 | K700E                                        |                    |       |           |
| A167 | K700E                                        |                    |       |           |
| A183 | K700E                                        |                    |       |           |
| A154 | R625L                                        |                    |       |           |
| A151 | R625L                                        |                    |       |           |
| A119 |                                              | P95H               |       |           |
| A192 |                                              | P95_R102dePPDSHHSR |       |           |
| A156 |                                              | P95H               |       |           |
| A207 |                                              | P95H               |       |           |
| A208 |                                              | P95H               |       |           |
| A122 |                                              | P95H               |       |           |
| A186 |                                              | P95H               |       |           |
| A177 |                                              | P95L               |       |           |
| A180 |                                              |                    | Q157P |           |
| A161 |                                              |                    | Q157P |           |
| A200 |                                              |                    | Q157R |           |
| A187 |                                              |                    | R156H |           |
| A191 |                                              |                    | S34F  |           |
| A114 |                                              |                    | S34F  |           |
| A160 |                                              | P95H               |       | H191Y     |
| A174 |                                              | P95R               |       | V253fs*36 |



Table S3: Clinical details and mutation status of the 11 patients used in the study of bone marrow monocytic, granulocytic and erythroid precursors.

| ID     | Disease Subtype | Age | Cell population present (1=yes, 0=no) |     |     | Mutation status (1=yes, 0=no) |       |      |     |      |       |      |      |      |
|--------|-----------------|-----|---------------------------------------|-----|-----|-------------------------------|-------|------|-----|------|-------|------|------|------|
|        |                 |     | MON                                   | GRA | ERY | SF3B1                         | SRSF2 | TET2 | CBL | IDH2 | ASXL1 | JAK2 | PHF6 | NPM1 |
| MDS142 | RA              | 76  | 1                                     | 0   | 0   | 1                             | 0     | 1    | 0   | 0    | 0     | 0    | 0    | 0    |
| MDS152 | RARS            | 64  | 1                                     | 0   | 1   | 0                             | 1     | 0    | 1   | 1    | 0     | 0    | 0    | 0    |
| MDS155 | MDS/AML         | 72  | 1                                     | 1   | 1   | 1                             | 0     | 0    | 0   | 0    | 1     | 1    | 0    | 0    |
| MDS163 | MDS/AML         | 76  | 1                                     | 1   | 1   | 1                             | 0     | 0    | 0   | 0    | 0     | 0    | 0    | 0    |
| MDS166 | RAEB2           | 44  | 1                                     | 1   | 1   | 1                             | 0     | 0    | 0   | 0    | 0     | 0    | 1    | 0    |
| MDS168 | MDS/AML         | 71  | 1                                     | 0   | 1   | 0                             | 1     | 0    | 0   | 1    | 0     | 0    | 0    | 1    |
| MDS177 | RAEB2           | 81  | 1                                     | 0   | 1   | 1                             | 0     | 0    | 0   | 0    | 0     | 0    | 0    | 0    |
| MDS178 | RARS            | 63  | 1                                     | 1   | 1   | 1                             | 0     | 1    | 0   | 0    | 0     | 0    | 0    | 0    |
| MDS189 | RARS            | 81  | 1                                     | 1   | 1   | 1                             | 0     | 0    | 0   | 0    | 0     | 0    | 0    | 0    |
| MDS191 | RA              | 83  | 1                                     | 1   | 0   | 0                             | 1     | 0    | 0   | 0    | 0     | 0    | 0    | 0    |
| MDS218 | RA              | 87  | 1                                     | 1   | 1   | 0                             | 1     | 1    | 0   | 0    | 1     | 0    | 0    | 0    |

Table S4: Top 40 significant aberrant splicing events in SF3B1mut, SRSF2mut and U2AF1mut MDS.

| SF3B1 mutant MDS |         |            |     |        |                      | SRSF2 mutant MDS |               |            |     |        |                      | U2AF1 mutant MDS |            |            |     |        |                      |
|------------------|---------|------------|-----|--------|----------------------|------------------|---------------|------------|-----|--------|----------------------|------------------|------------|------------|-----|--------|----------------------|
| Event ID         | Gene    | Event type | Chr | Strand | Start - End position | Event ID         | Gene          | Event type | Chr | Strand | Start - End position | Event ID         | Gene       | Event type | Chr | Strand | Start - End position |
| 7506             | TMEM91  | A3SS       | 19  | +      | 41889619-41889988    | 743              | PPII3         | MXE        | 2   | -      | 201747064-201747158  | 33174            | ANKRD12    | SE         | 18  | +      | 9204473-9204542      |
| 7507             | TMEM91  | A3SS       | 19  | +      | 41889465-41889988    | 19440            | MX1           | SE         | 21  | +      | 42802459-42802535    | 27516            | RAD51C     | SE         | 17  | +      | 56783849-56783969    |
| 518              | ERCC3   | RI         | 2   | -      | 128046912-128047400  | 20608            | RIMKLB        | SE         | 12  | +      | 8932630-8932708      | 17455            | CRYZ       | SE         | 1   | -      | 75172786-75172888    |
| 4728             | NICN1   | RI         | 3   | -      | 49462381-49462871    | 23987            | TIA1          | SE         | 2   | -      | 70455475-70455594    | 1940             | AC084018.1 | RI         | 12  | -      | 122233172-122234148  |
| 2362             | SNRPN   | A3SS       | 15  | +      | 25219434-25219603    | 26349            | C6orf25       | SE         | 6   | +      | 31691918-31692009    | 6163             | RNF216     | A3SS       | 7   | -      | 5778906-5779252      |
| 3211             | QTRT1   | RI         | 19  | +      | 10822836-10823304    | 28447            | LST1          | SE         | 6   | +      | 31555725-31555743    | 3301             | AP1G2      | RI         | 14  | -      | 24031712-24032847    |
| 5420             | RPRD1A  | RI         | 18  | -      | 33605560-33607038    | 28455            | LST1          | SE         | 6   | +      | 31555720-31555743    | 4380             | ZWINT      | RI         | 10  | -      | 58117198-58118220    |
| 5429             | TMEM91  | RI         | 19  | +      | 41888676-41889988    | 34068            | GGCT          | SE         | 7   | -      | 30540151-30540297    | 3880             | SLC35B1    | A3SS       | 17  | -      | 47783565-47783696    |
| 5375             | COASY   | RI         | 17  | +      | 40714168-40714505    | 36368            | C8orf59       | SE         | 8   | -      | 86131464-86131592    | 30413            | APLP2      | SE         | 11  | +      | 130007150-130007186  |
| 1520             | SNRPN   | A5SS       | 15  | +      | 25212175-25212387    | 36371            | C8orf59       | SE         | 8   | -      | 86131464-86131589    | 17704            | AC005154.6 | SE         | 7   | -      | 30591715-30591795    |
| 2359             | SNRPN   | A3SS       | 15  | +      | 25219457-25219603    | 1758             | LST1          | MXE        | 6   | +      | 31555417-31555510    | 4147             | GUCY1A3    | A3SS       | 4   | +      | 156617907-156618274  |
| 2896             | AMT     | RI         | 3   | -      | 49454210-49455151    | 28445            | LST1          | SE         | 6   | +      | 31555417-31555510    | 30841            | PCBP2      | SE         | 12  | +      | 53861588-53861627    |
| 6153             | ABCC5   | A3SS       | 3   | -      | 183703091-183703243  | 34270            | GMPR2         | SE         | 14  | +      | 24703312-24703447    | 13212            | MRPS28     | SE         | 8   | -      | 80940929-80941031    |
| 4975             | GPR108  | A3SS       | 19  | -      | 6730997-6731122      | 28               | S100A13       | RI         | 1   | -      | 153598795-153600074  | 12249            | INTS3      | SE         | 1   | +      | 153733495-153733585  |
| 3305             | AP1G2   | RI         | 14  | -      | 24031170-24031624    | 2457             | RNF34         | SE         | 12  | +      | 121840544-121840610  | 3122             | RRP12      | RI         | 10  | -      | 99118293-99118767    |
| 33241            | DPHS    | SE         | 1   | -      | 101458192-101458296  | 17455            | CRYZ          | SE         | 1   | -      | 75172786-75172888    | 14132            | YPEL5      | SE         | 2   | +      | 30371110-30371407    |
| 6131             | SUGP1   | A3SS       | 19  | -      | 19414532-19414852    | 37277            | MPI           | SE         | 15  | +      | 75189351-75189560    | 1076             | DHRS1      | RI         | 14  | -      | 24761389-24761990    |
| 2380             | ABTB1   | RI         | 3   | +      | 127396307-127396686  | 1389             | CRYZL1        | A3SS       | 21  | -      | 34971455-34971591    | 20633            | GUCY1A3    | SE         | 4   | +      | 156617907-156618001  |
| 2437             | SEPT6   | A3SS       | X   | -      | 118759297-118759359  | 14189            | RP11-354E11.2 | SE         | 10  | -      | 20013855-20013910    | 2872             | ZNF83      | RI         | 19  | -      | 53115630-53118050    |
| 30228            | ABCC5   | SE         | 3   | -      | 183703091-183703166  | 29831            | SLC25A26      | SE         | 3   | +      | 66286967-66287124    | 4410             | SCYL1      | RI         | 11  | +      | 65305740-65306175    |
| 30229            | ABCC5   | SE         | 3   | -      | 183703091-183703243  | 5801             | LST1          | A3SS       | 6   | +      | 31556294-31556686    | 4427             | C1orf43    | SE         | 1   | -      | 154192311-154192413  |
| 1579             | SERBP1  | A3SS       | 1   | -      | 67890570-67890660    | 6154             | VTI1A         | SE         | 10  | +      | 114208139-114208247  | 27002            | ARID2      | SE         | 12  | +      | 46298124-46298181    |
| 6376             | UXS1    | A3SS       | 2   | -      | 106781191-106781255  | 2935             | MAP2K2        | RI         | 19  | -      | 4094450-4095447      | 2935             | MAP2K2     | RI         | 19  | -      | 4094450-4095447      |
| 3372             | DYNLL1  | RI         | 12  | +      | 120933915-120934356  | 5601             | IMMP1L        | SE         | 11  | -      | 31477806-31477933    | 30796            | PTCHD3P1   | SE         | 10  | +      | 29747202-29747449    |
| 7563             | PPOX    | A3SS       | 1   | +      | 161137128-161137276  | 11281            | TSEN2         | SE         | 3   | +      | 12574160-12574272    | 6164             | RNF216     | A3SS       | 7   | -      | 5780603-5781446      |
| 4127             | THOC1   | A3SS       | 18  | -      | 224083-224200        | 5602             | IMMP1L        | SE         | 11  | -      | 31484718-31484852    | 13912            | HMGXB4     | SE         | 22  | +      | 35659974-35660089    |
| 5460             | TCEA2   | A3SS       | 20  | +      | 62703210-62703294    | 35758            | FES           | SE         | 15  | +      | 91434211-91434421    | 24105            | BAZ1A      | SE         | 14  | -      | 35255331-35255427    |
| 14165            | MZB1    | SE         | 5   | -      | 138725015-138725109  | 17810            | DGUOK         | SE         | 2   | +      | 74166036-74166149    | 32492            | NICN1      | SE         | 3   | -      | 49463315-49463429    |
| 6157             | ERGC3   | A3SS       | 20  | +      | 34144725-34144880    | 28446            | LST1          | SE         | 6   | +      | 31555417-31555510    | 22516            | AP1G2      | SE         | 14  | -      | 24035770-24035895    |
| 11475            | SNRPN   | SE         | 15  | +      | 25212175-25212299    | 35711            | TEX30         | SE         | 13  | -      | 103419622-103419828  | 3500             | PNPLA7     | RI         | 9   | -      | 140355085-140356072  |
| 11476            | SNRPN   | SE         | 15  | +      | 25212175-25212387    | 649              | GPBP1L1       | SE         | 1   | -      | 46151247-46151292    | 22809            | TRA2A      | SE         | 7   | -      | 23561750-23562051    |
| 1071             | CDC27   | A3SS       | 17  | -      | 45229171-45229302    | 2391             | BDH2          | RI         | 4   | -      | 104006505-104007697  | 14563            | LAT2       | SE         | 7   | +      | 73629151-73629429    |
| 28927            | ICA1    | SE         | 7   | -      | 8267267-8267481      | 17539            | NHP2L1        | SE         | 22  | -      | 42083725-42084331    | 9625             | NR2C2AP    | SE         | 19  | -      | 19313278-19313384    |
| 697              | METTL5  | A3SS       | 2   | -      | 170668966-170669034  | 29515            | PFKM          | SE         | 12  | +      | 48529073-48529166    | 16107            | ELK3       | SE         | 12  | +      | 96591803-96591920    |
| 4277             | LARP4   | A3SS       | 12  | +      | 50822699-50822873    | 2560             | WDR75         | A3SS       | 2   | +      | 190313970-190315694  | 29817            | POLE2      | SE         | 14  | -      | 50121501-50121556    |
| 4070             | ZNF410  | A3SS       | 14  | +      | 74360478-74360635    | 32534            | TAMM41        | SE         | 3   | -      | 11886364-11886570    | 22811            | TRA2A      | SE         | 7   | -      | 23561739-23562051    |
| 4415             | ANAPC5  | A3SS       | 12  | -      | 121766118-121766300  | 25161            | C12orf73      | SE         | 12  | -      | 104347191-104347312  | 3852             | MBD2       | SE         | 18  | -      | 51714083-51714207    |
| 4520             | FOXRED1 | A3SS       | 11  | +      | 126143210-126143349  | 8830             | BRD8          | SE         | 5   | -      | 137502206-137502416  | 22808            | TRA2A      | SE         | 7   | -      | 23561972-23562051    |
| 4363             | SEPT2   | A3SS       | 2   | +      | 242275373-242275513  | 331              | SMOX          | RI         | 20  | +      | 4162735-4163495      | 24415            | POLDIP3    | SE         | 22  | -      | 42997975-42998062    |
| 252              | PSME2   | RI         | 14  | -      | 24614918-24615449    | 27873            | CASP8         | SE         | 2   | +      | 202139611-202139676  | 25132            | GOLGA2     | SE         | 9   | -      | 131035063-131035144  |

Table S5: Biological pathways identified by IPA as significant in SF3B1mut MDS versus Healthy control and Splicing factor wildtype MDS (SFWT).

| Ingenuity Canonical Pathways               | Versus Healthy Control |                                                 | Versus SFWT   |                                                 |
|--------------------------------------------|------------------------|-------------------------------------------------|---------------|-------------------------------------------------|
|                                            | -log(p-value)          | Genes found/ Genes in pathway (No. Genes found) | -log(p-value) | Genes found/ Genes in pathway (No. Genes found) |
| Oxidative Phosphorylation                  | 3.82                   | 0.441 (30)                                      | 8.01          | 0.522 (36)                                      |
| Sirtuin Signaling Pathway                  | 3.47                   | 0.35 (63)                                       | 4.01          | 0.33 (60)                                       |
| Mitochondrial Dysfunction                  | 2.47                   | 0.35 (41)                                       | 6.08          | 0.407 (48)                                      |
| Protein Ubiquitination Pathway             | 4.37                   | 0.362 (71)                                      | 2.13          | 0.284 (57)                                      |
| TCA Cycle II (Eukaryotic)                  | 2.24                   | 0.526 (10)                                      | 2.04          | 0.474 (9)                                       |
| Heme Biosynthesis II                       | 2.51                   | 0.75 (6)                                        | 1.89          | 0.625 (5)                                       |
| Heme Biosynthesis from Uroporphyrinogen-I  | 1.88                   | 1 (3)                                           | 2.04          | 1 (3)                                           |
| BER pathway                                | 1.83                   | 0.6 (6)                                         | 2.09          | 0.6 (6)                                         |
| EIF2 Signaling                             | 1.76                   | 0.312 (49)                                      | 4.74          | 0.352 (57)                                      |
| Regulation of eIF4 and p70S6K Signaling    | 1.65                   | 0.322 (37)                                      | 1.8           | 0.295 (36)                                      |
| Methionine Degradation I (to Homocysteine) | 1.37                   | 0.467 (7)                                       | 1.47          | 0.438 (7)                                       |
| Spermine and Spermidine Degradation I      | 1.36                   | 0.75 (3)                                        | 1.51          | 0.75 (3)                                        |

Table S6: Biological pathways identified by IPA as significant in SRSF2mut MDS versus Healthy control and Splicing factor wildtype MDS (SFWT).

| Ingenuity Canonical Pathways                   | Versus Healthy Control |                                                 | Versus SFWT   |                                                 |
|------------------------------------------------|------------------------|-------------------------------------------------|---------------|-------------------------------------------------|
|                                                | -log(p-value)          | Genes found/ Genes in pathway (No. Genes found) | -log(p-value) | Genes found/ Genes in pathway (No. Genes found) |
| EIF2 Signaling                                 | 4.22                   | 0.39 (60)                                       | 4.87          | 0.312 (50)                                      |
| Sirtuin Signaling Pathway                      | 3.37                   | 0.362 (64)                                      | 3.59          | 0.28 (51)                                       |
| Mitochondrial Dysfunction                      | 3.15                   | 0.386 (44)                                      | 5.14          | 0.345 (40)                                      |
| Oxidative Phosphorylation                      | 2.8                    | 0.418 (28)                                      | 4.29          | 0.377 (26)                                      |
| Heme Biosynthesis II                           | 3.45                   | 0.875 (7)                                       | 2.24          | 0.625 (5)                                       |
| Heme Biosynthesis from Uroporphyrinogen-I      | 1.82                   | 1 (3)                                           | 2.27          | 1 (3)                                           |
| Protein Ubiquitination Pathway                 | 1.77                   | 0.317 (60)                                      | 1.54          | 0.229 (46)                                      |
| Hypoxia Signaling in the Cardiovascular System | 1.44                   | 0.364 (20)                                      | 1.82          | 0.298 (17)                                      |
| Antigen Presentation Pathway                   | 3.47                   | 0.577 (15)                                      | 1.36          | 0.321 (9)                                       |

Table S7: Biological pathways identified by IPA as significant in U2AF1mut MDS versus Healthy control and Splicing factor wildtype MDS (SFWT).

| Ingenuity Canonical Pathways              | Versus Healthy Control |                                                 | Versus SFWT   |                                                 |
|-------------------------------------------|------------------------|-------------------------------------------------|---------------|-------------------------------------------------|
|                                           | -log(p-value)          | Genes found/ Genes in pathway (No. Genes found) | -log(p-value) | Genes found/ Genes in pathway (No. Genes found) |
| Sirtuin Signaling Pathway                 | 3.24                   | 0.366 (64)                                      | 3.37          | 0.282 (51)                                      |
| Heme Biosynthesis II                      | 3.38                   | 0.875 (7)                                       | 2.19          | 0.625 (5)                                       |
| Oxidative Phosphorylation                 | 1.71                   | 0.373 (25)                                      | 3.32          | 0.353 (24)                                      |
| Mitochondrial Dysfunction                 | 1.68                   | 0.342 (39)                                      | 3.31          | 0.308 (36)                                      |
| EIF2 Signaling                            | 1.65                   | 0.327 (51)                                      | 2.03          | 0.256 (41)                                      |
| Colanic Acid Building Blocks Biosynthesis | 1.95                   | 0.571 (8)                                       | 1.57          | 0.429 (6)                                       |
| Protein Ubiquitination Pathway            | 1.49                   | 0.314 (60)                                      | 1.53          | 0.234 (47)                                      |
| Tetrapyrrole Biosynthesis II              | 1.79                   | 0.8 (4)                                         | 1.36          | 0.6 (3)                                         |
| Galactose Degradation I (Leloir Pathway)  | 1.79                   | 0.8 (4)                                         | 1.36          | 0.6 (3)                                         |
| Estrogen Receptor Signaling               | 2.71                   | 0.398 (35)                                      | 1.3           | 0.253 (23)                                      |

Table S8: Aberrantly spliced genes involved in suppression/regulation of R-loop formation and in the DNA damage response in SFmut MDS.

| <i>Gene</i> | <b>Aberrantly spliced (1=yes) versus SF-WT MDS and Healthy Control</b> |                 |                 |
|-------------|------------------------------------------------------------------------|-----------------|-----------------|
|             | <i>SF3B1mut</i>                                                        | <i>SRSF2mut</i> | <i>U2AF1mut</i> |
| AID         | 0                                                                      | 0               | 0               |
| AQR         | 0                                                                      | 0               | 0               |
| AQR         | 0                                                                      | 0               | 0               |
| ASF         | 0                                                                      | 0               | 0               |
| ATM         | 0                                                                      | 0               | 0               |
| ATR         | 1                                                                      | 1               | 0               |
| BRCA1       | 0                                                                      | 0               | 0               |
| BRCA2       | 0                                                                      | 0               | 0               |
| CHEK1       | 0                                                                      | 1               | 0               |
| ERCC1       | 0                                                                      | 0               | 0               |
| ERCC1       | 0                                                                      | 0               | 0               |
| ERCC2       | 0                                                                      | 0               | 0               |
| ERCC3       | 1                                                                      | 0               | 0               |
| ERCC4       | 0                                                                      | 0               | 0               |
| ERCC4       | 0                                                                      | 0               | 0               |
| ERCC5       | 0                                                                      | 0               | 0               |
| ERCC5       | 0                                                                      | 0               | 0               |
| ERCC6       | 0                                                                      | 0               | 0               |
| ERCC8       | 0                                                                      | 0               | 1               |
| FANCA       | 0                                                                      | 0               | 0               |
| FANCC       | 0                                                                      | 0               | 0               |
| FANCD2      | 0                                                                      | 0               | 0               |
| FANCE       | 0                                                                      | 0               | 0               |
| FANCF       | 0                                                                      | 0               | 0               |
| FANCG       | 0                                                                      | 0               | 0               |
| FANCI       | 1                                                                      | 0               | 0               |
| FANCL       | 0                                                                      | 0               | 0               |
| FANCM       | 0                                                                      | 0               | 1               |
| FIP1L1      | 0                                                                      | 0               | 0               |
| FTO         | 0                                                                      | 0               | 0               |
| MUS81       | 0                                                                      | 0               | 0               |
| PIF1        | 0                                                                      | 0               | 0               |
| RAD51       | 0                                                                      | 0               | 0               |
| RAD52       | 0                                                                      | 0               | 0               |
| RANBP2      | 0                                                                      | 0               | 0               |
| RRM3        | 0                                                                      | 0               | 0               |
| S100A9      | 0                                                                      | 0               | 0               |
| SETX        | 1                                                                      | 1               | 0               |
| TOP1        | 0                                                                      | 0               | 0               |
| TOP3B       | 0                                                                      | 0               | 0               |
| TPR         | 0                                                                      | 0               | 0               |

Table S9: Differences of clinical variables between SFmut MDS and SFwt MDS patients in our cohort. Details of statistical tests performed are provided in the Supplementary methods. \* = p<0.05, \*\* = p< 0.01, \*\*\* = p< 0.001

| Group    | Continuous variables |     |     |      |         | Categorical variables |      |                        |
|----------|----------------------|-----|-----|------|---------|-----------------------|------|------------------------|
|          | Hb                   | WBC | ANC | Plt. | Blast % | Gender                | IPSS | Transfusion Dependency |
| SF3B1mut | ns                   | **  | *** | ***  | ***     | ns                    | *    | ns                     |
| SRSF2mut | ns                   | ns  | ns  | ns   | ns      | ns                    | ns   | ns                     |
| U2AF1mut | ns                   | ns  | ns  | ns   | ns      | ns                    | ns   | ns                     |

Table S10: Multivariate Cox proportional hazard modeling for 14 aberrantly spliced isoforms that predict survival in MDS.

| Gene   | Transcript      | p-value              |       |          |           |            |            |          | Hazard Ratio         |       |          |           |            |            |          |
|--------|-----------------|----------------------|-------|----------|-----------|------------|------------|----------|----------------------|-------|----------|-----------|------------|------------|----------|
|        |                 | Transcript level Low | Age   | Sex Male | IPSS High | IPSS Int-1 | IPSS Int-2 | IPSS Low | Transcript level Low | Age   | Sex Male | IPSS High | IPSS Int-1 | IPSS Int-2 | IPSS Low |
| AHSA2  | ENST00000493310 | 0.029                | 0.407 | 0.103    | 0.979     | 0.027      | 0.172      | 0.006    | -1.90                | -0.02 | 0.88     | -0.03     | -2.31      | -1.63      | -3.13    |
| CAP1   | ENST00000424977 | 0.004                | 0.472 | 0.089    | 0.152     | 0.207      | 0.703      | 0.022    | 1.70                 | 0.02  | 0.89     | 1.67      | -1.07      | -0.36      | -2.24    |
| CD46   | ENST00000480003 | 0.039                | 0.791 | 0.149    | 0.077     | 0.582      | 0.879      | 0.097    | -1.19                | -0.01 | 0.77     | 2.16      | -0.50      | 0.16       | -1.65    |
| CRTC2  | ENST00000487235 | 0.035                | 0.669 | 0.046    | 0.368     | 0.120      | 0.667      | 0.021    | 1.13                 | 0.01  | 1.04     | 0.99      | -1.30      | -0.40      | -2.24    |
| DPH5   | ENST00000477293 | 0.026                | 0.510 | 0.103    | 0.255     | 0.190      | 0.701      | 0.021    | -1.38                | -0.02 | 0.84     | 1.27      | -1.10      | 0.39       | -2.22    |
| FCGR2A | ENST00000482233 | 0.016                | 0.259 | 0.019    | 0.130     | 0.215      | 0.888      | 0.036    | 1.44                 | 0.03  | 1.37     | 1.67      | -1.04      | 0.14       | -2.07    |
| IFI44  | ENST00000446486 | 0.012                | 0.542 | 0.062    | 0.347     | 0.245      | 0.796      | 0.021    | -1.38                | 0.01  | 0.98     | 1.03      | -0.98      | -0.25      | -2.27    |
| IFI44L | ENST00000462041 | 0.009                | 0.689 | 0.066    | 0.865     | 0.021      | 0.242      | 0.003    | -1.60                | 0.01  | 0.96     | -0.22     | -2.37      | -1.32      | -3.58    |
| MECR   | ENST00000464915 | 0.022                | 0.951 | 0.109    | 0.265     | 0.265      | 0.920      | 0.030    | -1.27                | 0.00  | 0.83     | 1.23      | -0.95      | -0.10      | -2.10    |
| MECR   | ENST00000493928 | 0.022                | 0.632 | 0.081    | 0.179     | 0.225      | 0.561      | 0.019    | -1.29                | 0.01  | 0.96     | 1.47      | -1.01      | -0.59      | -2.31    |
| NASP   | ENST00000472408 | 0.014                | 0.605 | 0.041    | 0.475     | 0.112      | 0.655      | 0.017    | -1.42                | 0.01  | 1.15     | 0.82      | -1.44      | -0.47      | -2.41    |
| PABPC4 | ENST00000525669 | 0.036                | 0.646 | 0.085    | 0.319     | 0.181      | 0.974      | 0.030    | -1.10                | 0.01  | 0.90     | 1.09      | -1.12      | -0.03      | -2.10    |
| PFDN5  | ENST00000552341 | 0.042                | 0.597 | 0.115    | 0.132     | 0.637      | 0.872      | 0.171    | -1.51                | -0.01 | 0.85     | 1.70      | -0.43      | 0.17       | -1.42    |
| PPOX   | ENST00000466452 | 0.031                | 0.409 | 0.129    | 0.116     | 0.406      | 0.740      | 0.073    | -1.24                | 0.02  | 0.81     | 1.81      | -0.71      | -0.34      | -1.76    |
| PTPRC  | ENST00000413409 | 0.050                | 0.697 | 0.192    | 0.828     | 0.046      | 0.392      | 0.006    | -1.11                | 0.01  | 0.72     | 0.27      | -1.87      | -0.90      | -3.00    |
| PTPRC  | ENST00000571847 | 0.050                | 0.697 | 0.192    | 0.828     | 0.046      | 0.392      | 0.006    | -1.11                | 0.01  | 0.72     | 0.27      | -1.87      | -0.90      | -3.00    |
| PTPRC  | ENST00000530727 | 0.009                | 0.300 | 0.021    | 0.439     | 0.257      | 0.806      | 0.016    | -1.51                | 0.03  | 1.26     | 0.87      | -0.97      | -0.23      | -2.37    |
| PTPRC  | ENST00000575923 | 0.009                | 0.300 | 0.021    | 0.439     | 0.257      | 0.806      | 0.016    | -1.51                | 0.03  | 1.26     | 0.87      | -0.97      | -0.23      | -2.37    |

Table S11: Biological pathways identified by IPA as significant in ZRSR2 mutant MDS (with co-mutation of SRSF2) versus Healthy control and SRSF2mut MDS.

| Ingenuity Canonical Pathways              | Versus Healthy Control |                                                    | Versus SRSF2mut MDS |                                                    |
|-------------------------------------------|------------------------|----------------------------------------------------|---------------------|----------------------------------------------------|
|                                           | -log(p-value)          | Genes found/ Genes in pathway<br>(No. Genes found) | -log(p-value)       | Genes found/ Genes in pathway<br>(No. Genes found) |
| Sirtuin Signaling Pathway                 | 2.2                    | 0.221 (38)                                         | 1.73                | 0.198 (34)                                         |
| Galactose Degradation I (Leloir Pathway)  | 1.59                   | 0.6 (3)                                            | 1.67                | 0.6 (3)                                            |
| Protein Ubiquitination Pathway            | 1.5                    | 0.2 (37)                                           | 1.56                | 0.191 (35)                                         |
| Colanic Acid Building Blocks Biosynthesis | 1.35                   | 0.357 (5)                                          | 2.3                 | 0.462 (6)                                          |

**Figure S1: Mutational landscape of MDS patient samples.** **A**, Mutations identified in the cohort of 84 MDS cases. Of these, 28 had *SF3B1* mutations, 8 had *SRSF2* mutations, 6 had *U2AF1* mutations and 2 had *ZRSR2* mutations (with co-mutation of *SRSF2*). **B**, Mutations identified in the 11 patients used for the study of granulocytic, monocytic and erythroid precursors.

**Figure S2: Gene expression levels of nonsense-mediated mRNA decay (NMD)-sensitive and NMD-insensitive events associated with splicing factor mutant MDS.** **A-D**, Tukey box plots of the expression levels of NMD-sensitive and NMD-insensitive aberrant splicing events identified in *SRSF2*mut MDS (**A**), *U2AF1*mut MDS (**B**), and *SF3B1*mut MDS (**C**, all event types and **D**, A3SS events).

**Figure S3: GO characteristics in splicing factor mutant MDS.** **A**, REVIGO treemap of overlapping significant BP GOs identified in *SF3B1* mutant and *SRSF2* mutant CD34+ MDS patients. **B**, REVIGO treemap of BP GOs identified as significant in only the *SF3B1* mutant CD34+ MDS patients. REVIGO panel sizes are inversely proportional to enrichment p values.

**Figure S4: Sirtuin pathway dysregulation in splicing factor mutant MDS.** Example Sirtuin pathway map and genes found to be aberrantly spliced in *SF3B1* mutant MDS. The pathway map was generated from IPA and the aberrantly spliced genes are denoted by red fills.

**Figure S5: Aberrant splice site usage in splicing factor mutant MDS.** **A**, Sequence logos for upstream and downstream cryptic 3' splice sites (top left and lower right sequence logos respectively) along with their associated canonical sites (top right and lower left sequence logos respectively) in *SF3B1* mutant MDS. **B**, Density plot showing the distance (log<sub>2</sub>) between pairs of competing 3' splice sites. **C**, Sequence logos showing the 5'SS and 3'SS usage in *U2AF1* mutant patients harbouring S34 (top) and R156/Q157 variants (bottom). **D**, Sequence logos showing the 5'SS and 3'SS usage in *SRSF2* mutant MDS. **E**, kmer frequency plot showing showed enrichment of CCNG motifs in cassette exons upregulated in *SRSF2* mutant cells, while GGNG motifs were enriched in downregulated exons.

**Figure S6: Examples of decreased intron retention in *SF3B1* mutants.** **A**, *NICN1* intron 4. **B**, *ERCC3* intron 10 shows decreased intron retention in association with significant upregulation of an upstream cryptic A3SS. **C**, *DOM3Z* intron 3 shows decreased retention of an intron using an upstream A3SS. In this case, the change in A3SS usage was non-significant. All intron retention events are shown 5' to 3' in reverse orientation (from right to left)

**Figure S7: Additional gene isoforms predictive of MDS patient survival.** **A-F**, Kaplan-Meier survival plots of isoforms from 6 genes: *AHSA2* (**A**), *DPH5* (**B**), *CAP1* (**C**), *IFI44* (**D**), *MECR* (**E**), and *NASP* (**F**).

**Figure S8: Aberrant splicing events and dysregulated pathways in  $CD34^+$  cells of *ZRSR2*mut MDS patients.** **A**, Venn Diagram showing the aberrant splicing events identified in *ZRSR2* mutant MDS patients (with co-mutation of *SRSF2*) versus healthy controls and versus *SRSF2*mut MDS patients. **B**, Ranked heatmap, as determined by significance across both comparisons of *ZRSR2*mutant MDS patients versus healthy controls and versus *SRSF2*mut MDS patients, showing the significant dysregulated pathways.

**Figure S9: Principal component analysis (PCA) of bone marrow cell populations of *SFmut* MDS.** Monocytic (MON), granulocytic (GRA), and erythroid (ERY) precursors isolated from the bone marrow of *SF3B1* mutant and *SRSF2* mutant MDS patients and healthy controls showing strong clustering by precursor cell population.

**Figure S10: Aberrant splicing in BM cell populations of *SFmut* MDS.** **A-B**, UpSet plots showing the overlap of aberrant splicing events identified in  $CD34^+$  cells, and in monocyte (MON), granulocyte (GRA) and erythroid (ERY) precursor cell populations isolated from *SF3B1* (**A**) and *SRSF2* (**B**) mutant MDS patient samples.

**Figure S11: Validation of aberrant splicing events identified in splicing factor mutant MDS.** **A**, Sashimi plot showing the *AKAP8* SE event in *SRSF2* mutant MDS patient samples which results in the inclusion of an exon containing a premature termination codon (PTC). **B**, *AKAP8* downregulation in  $CD34^+$  cells of *SRSF2* mutant MDS patients (RNA-seq data). **C-D**, PCR band isoform ratio quantification (**C**) and semi-quantitative band visualization using an Agilent 2100 bioanalyzer (**D**) of the aberrant splicing event in *AKAP8* measured in  $CD34^+$



cells of *SRSF2* mutant MDS patient samples, SF-WT MDS patient samples and healthy controls. **E**, Sashimi plot showing the *SEPT2* A3SS event in *SF3B1* mutant MDS patient samples which results in a frameshift and generation of a PTC. **F**, *SEPT2* downregulation in CD34<sup>+</sup> cells of *SF3B1* mutant MDS patients (RNA-seq data). **G-H**, PCR band isoform ratio quantification (**G**) and semi-quantitative band visualization using an Agilent 2100 bioanalyzer (**H**) of the aberrant splicing event in *SEPT2* measured in CD34<sup>+</sup> cells of *SF3B1* mutant MDS patient samples, SF-WT MDS patient samples and healthy controls. **I-J**, PCR band ratio quantification plots for aberrant splicing events identified in *METTL17* (**I**) and *PFKM* (**J**) in *SRSF2* mutant MDS, measured in CD34<sup>+</sup> cells of *SRSF2* mutant MDS patient samples, SF-WT MDS patient samples and healthy controls. All PCR band ratio quantification plots are generated with a minimum of 5 samples per group and data are represented as mean  $\pm$  SEM. For PCR band ratio quantification plots (**C**, **G**, **I** and **J**), p-values were obtained from a one-way ANOVA with Tukey's post-test (for normally distributed data with groups of equal variance), or a non-parametric Kruskal-Wallis with Dunn's post-test. For *AKAP8* and *SEPT2* expression plots (**B** and **F**) statistical significance was obtained from DESeq2. \*p<0.05, \*\*p< 0.01, \*\*\*p< 0.001.

**Figure S1**

**A**

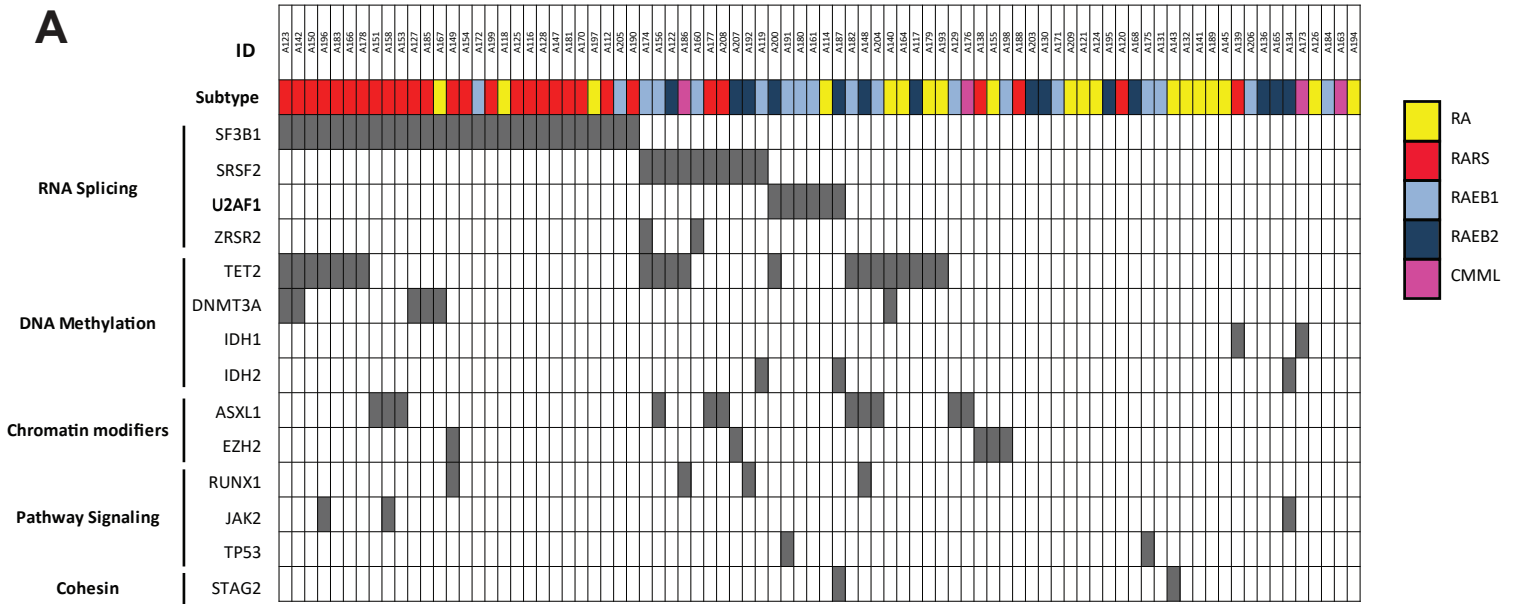

**B**

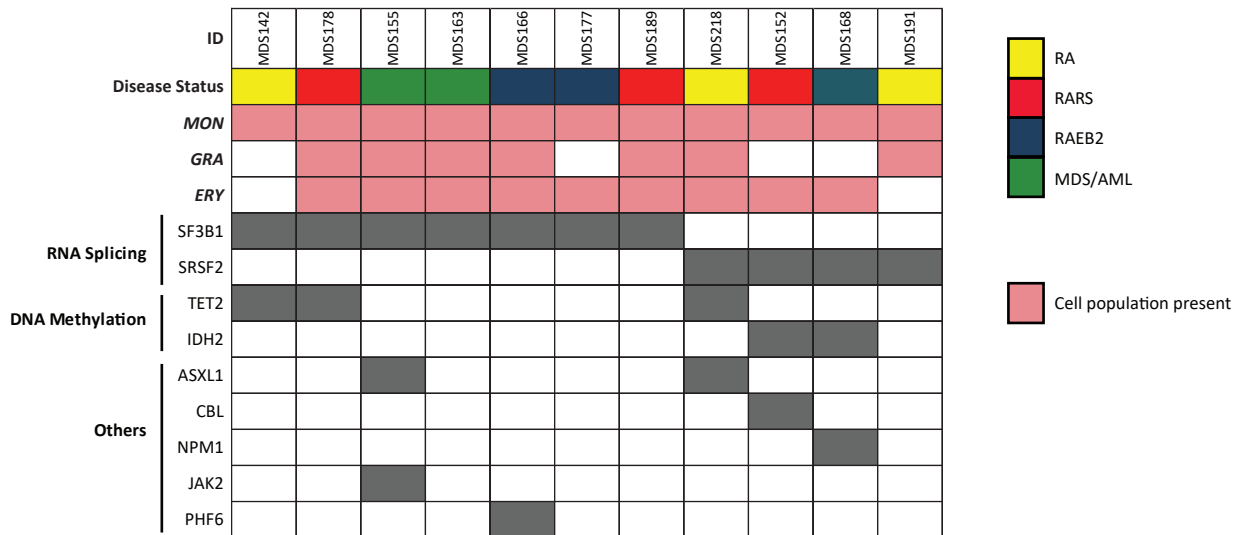

Figure S2

**A**

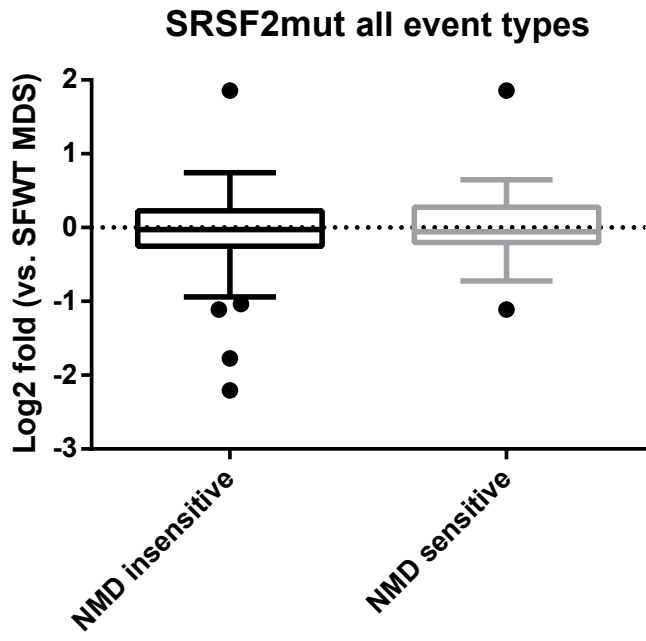

**B**

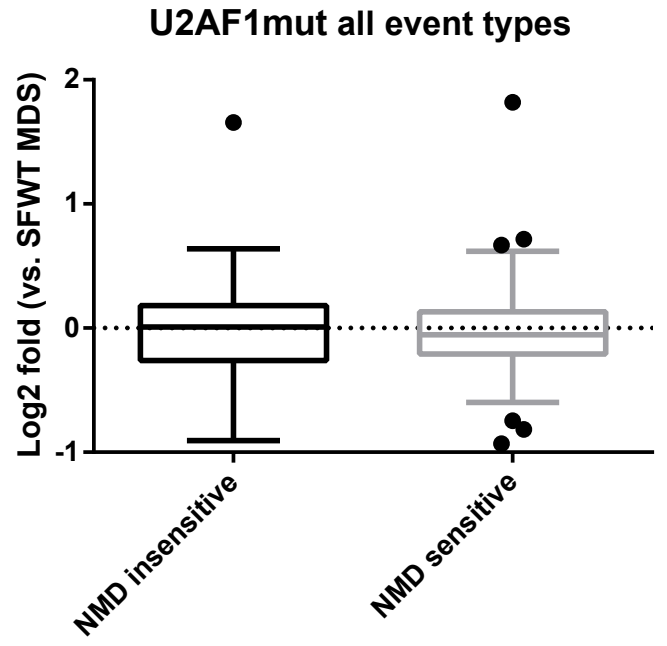

**C**

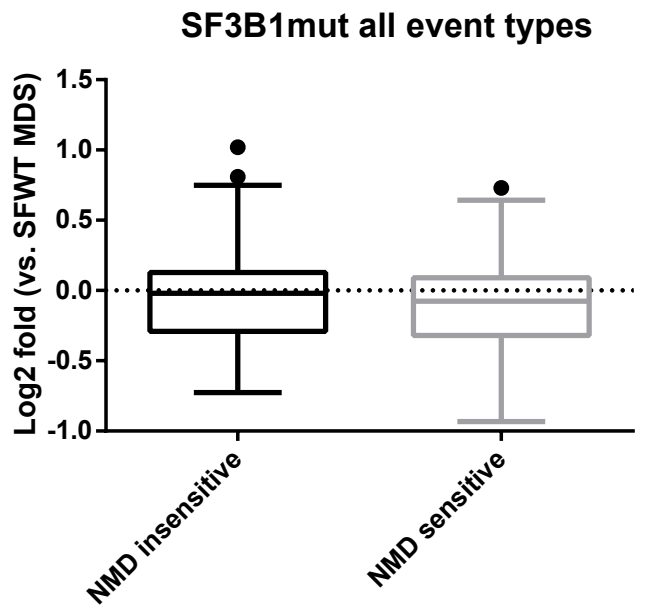

**D**

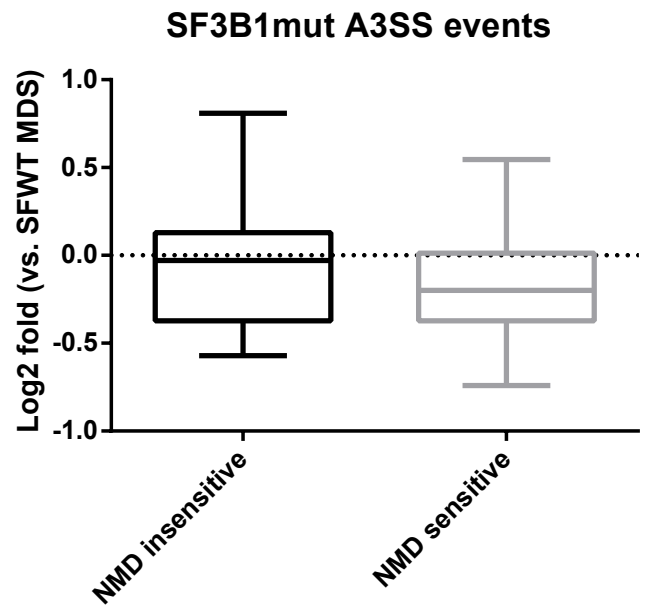

**Figure S3**

**A**

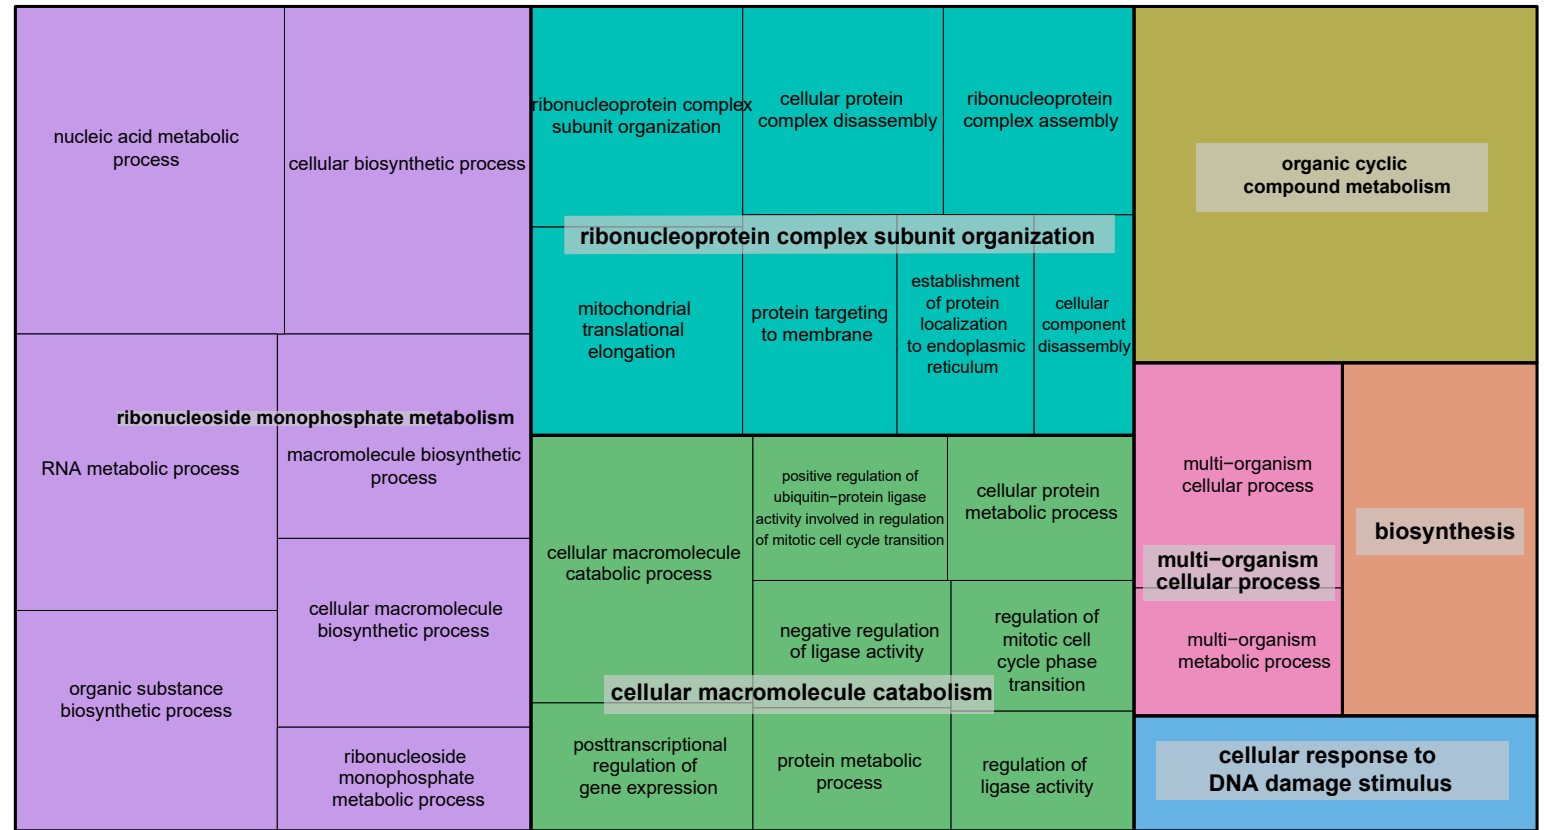

**B**

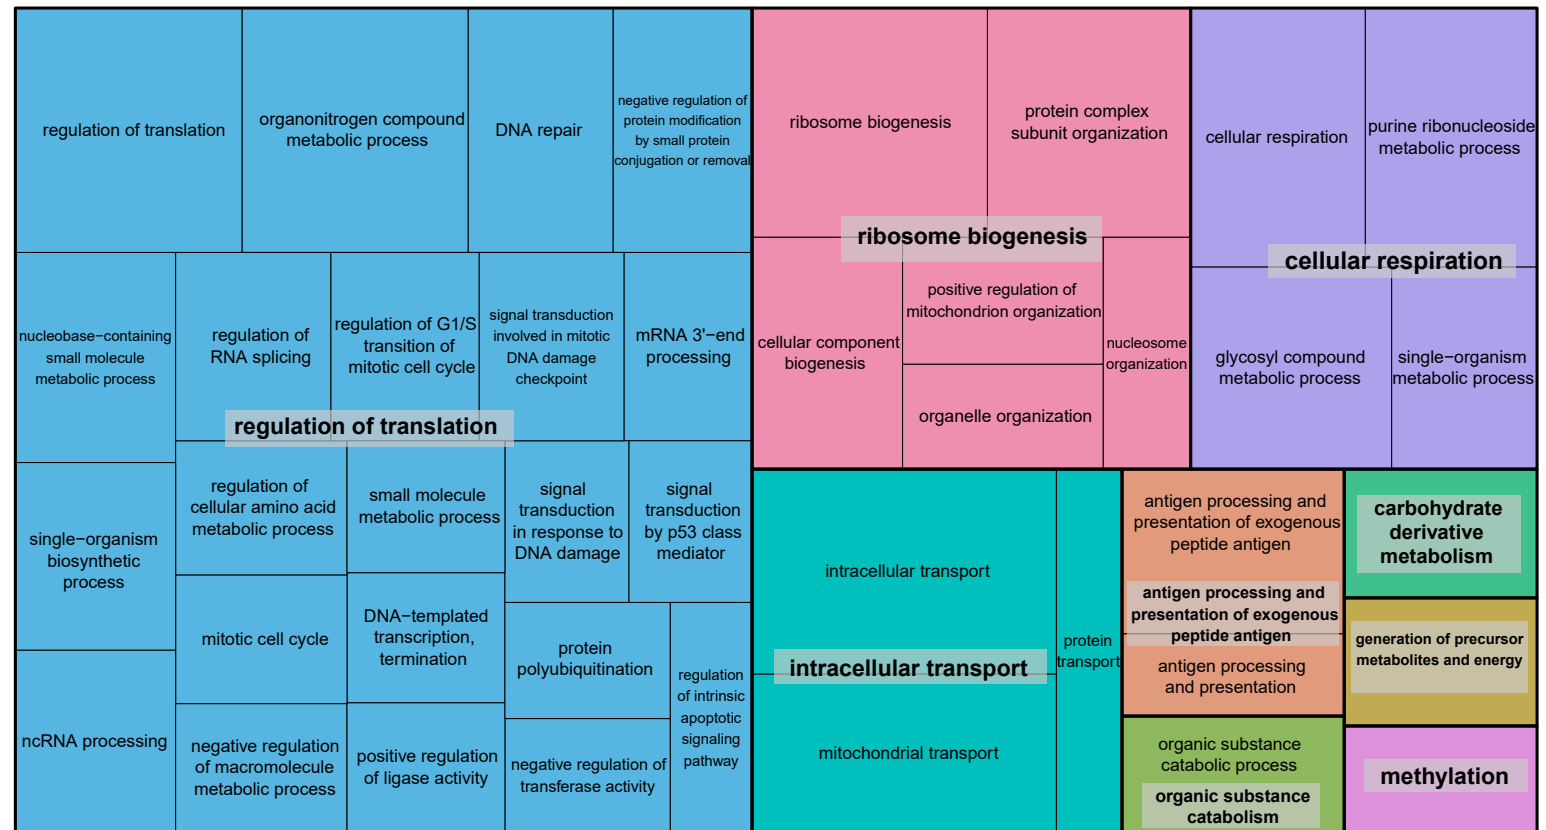

Figure S4

Sirtuins are class III histone deacetylase enzymes that use NAD<sup>+</sup> as a co-substrate for their enzymatic activities. In mammals, there are 7 sirtuin members (SIRT1-7), which play important roles in aging, metabolism, cancer, inflammation, DNA repair and cellular responses to stress.

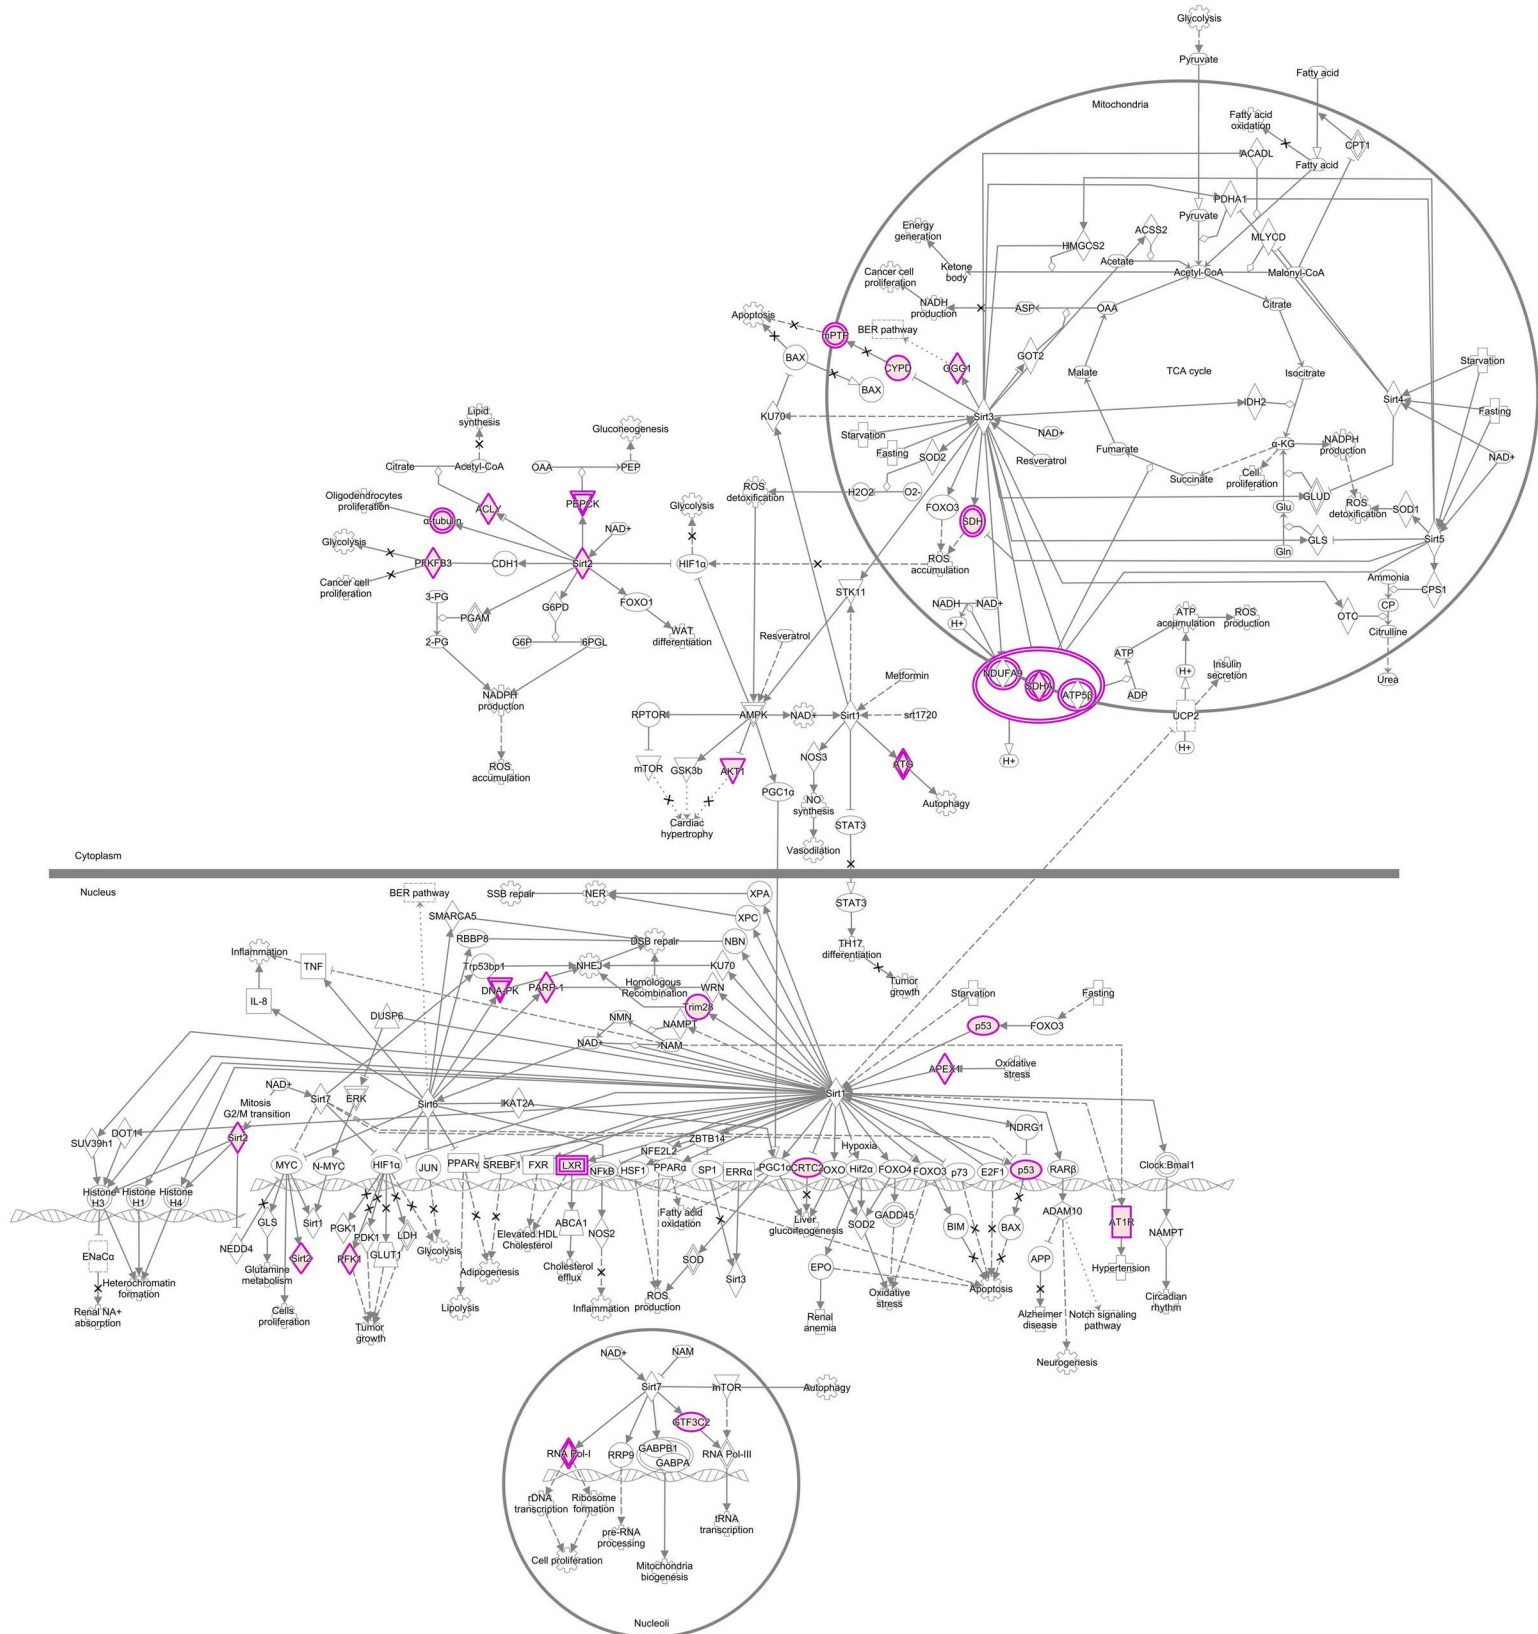

**Figure S5**

**A**

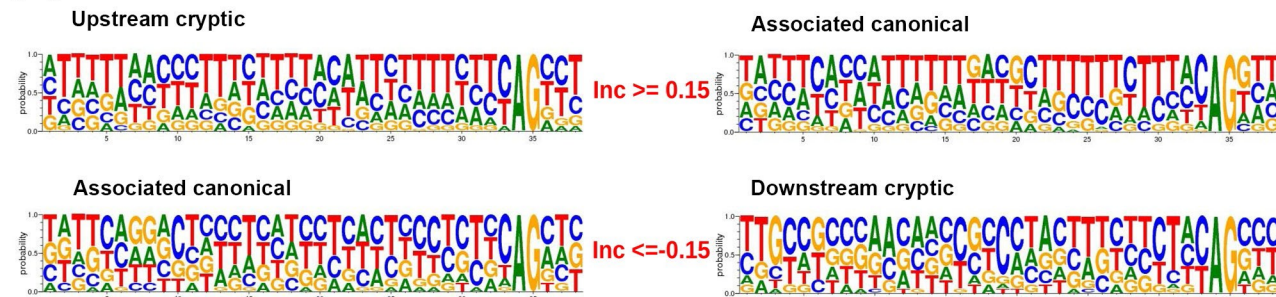

**B**

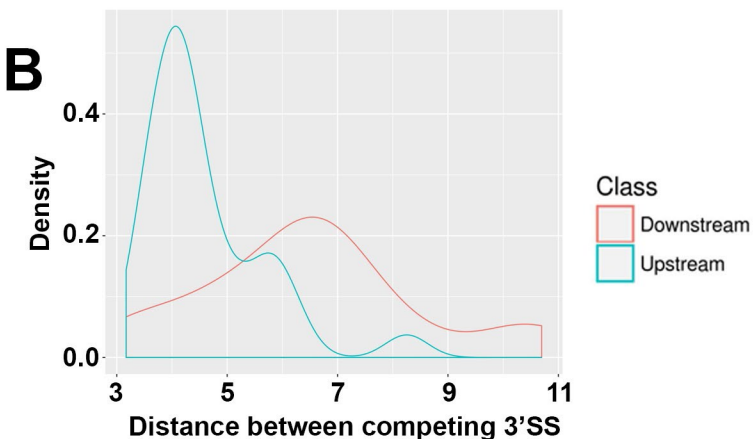

**C**

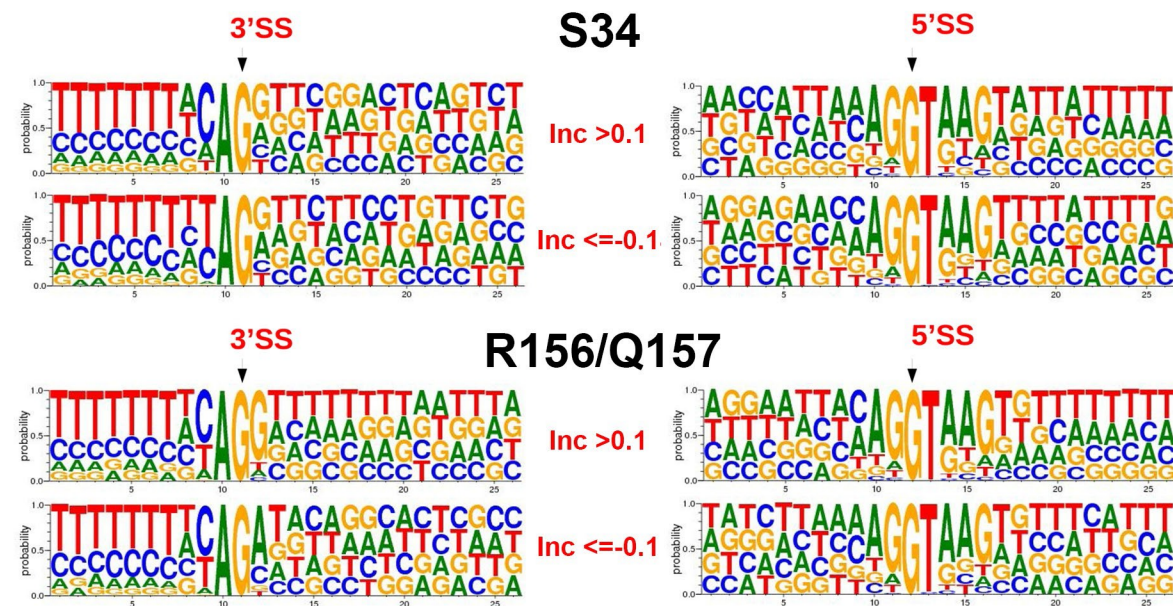

**D**

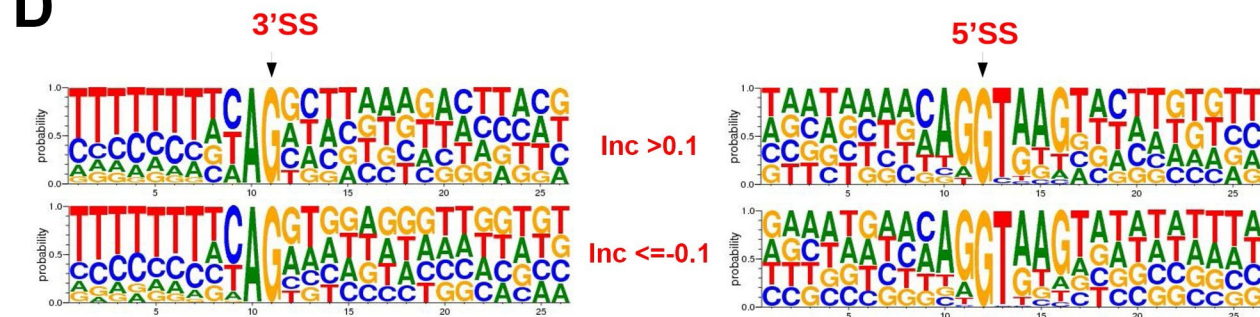

**E**

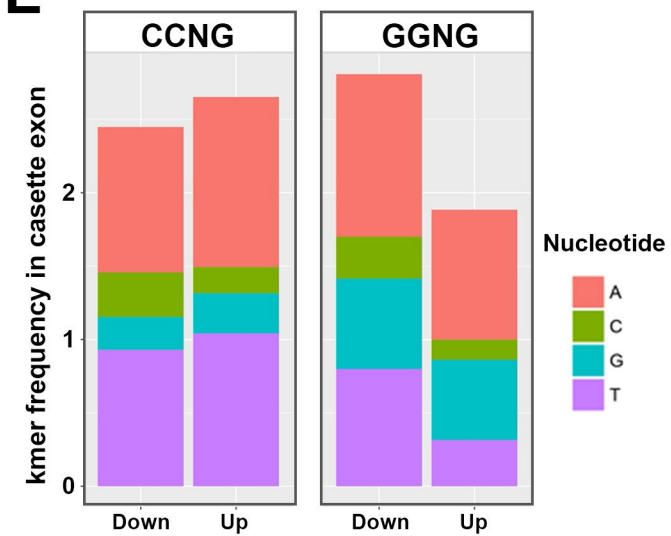

Figure S6

**A**

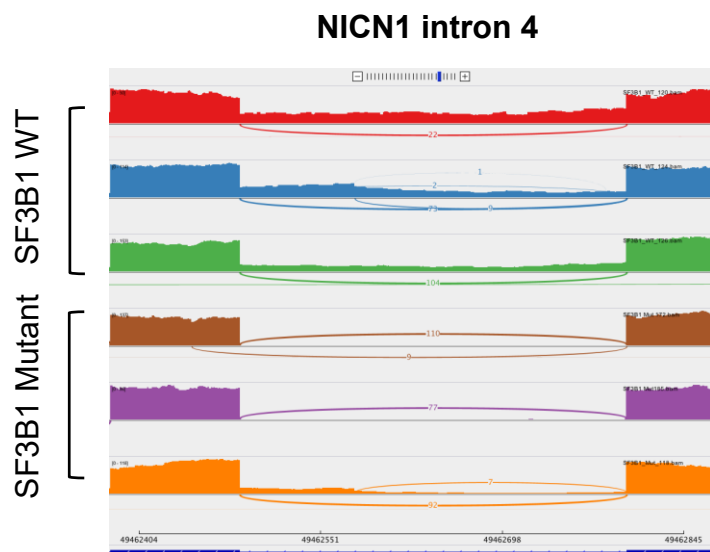

**B**

**ERCC3 Intron 10**  
A3SS RI

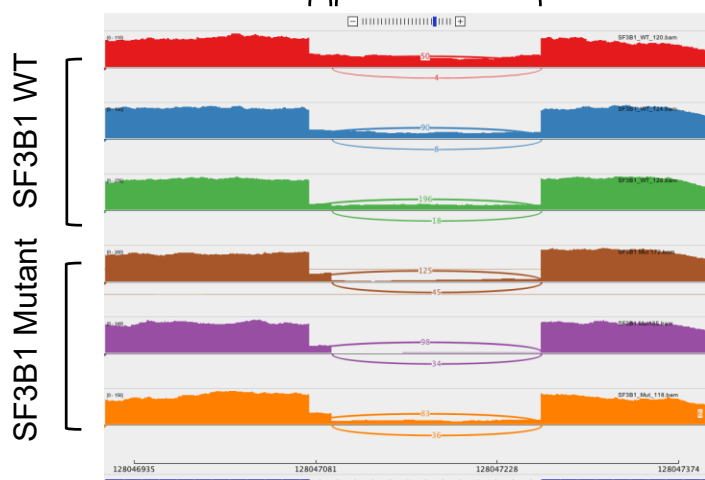

**C**

**DOM3Z Intron 3**  
A3SS RI

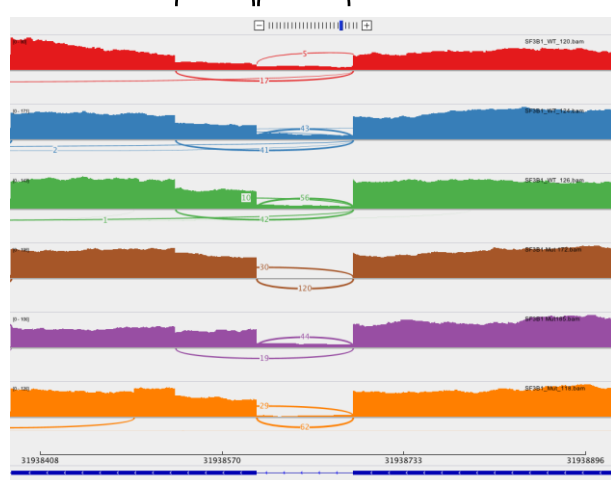

# Figure S7

**A**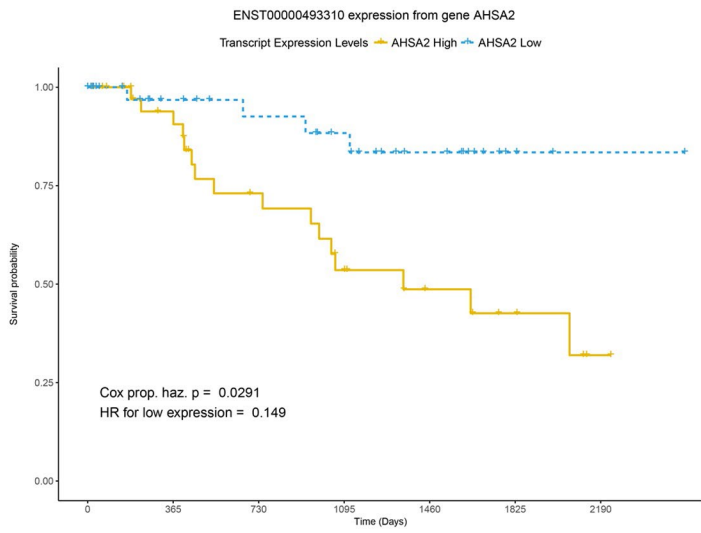**B**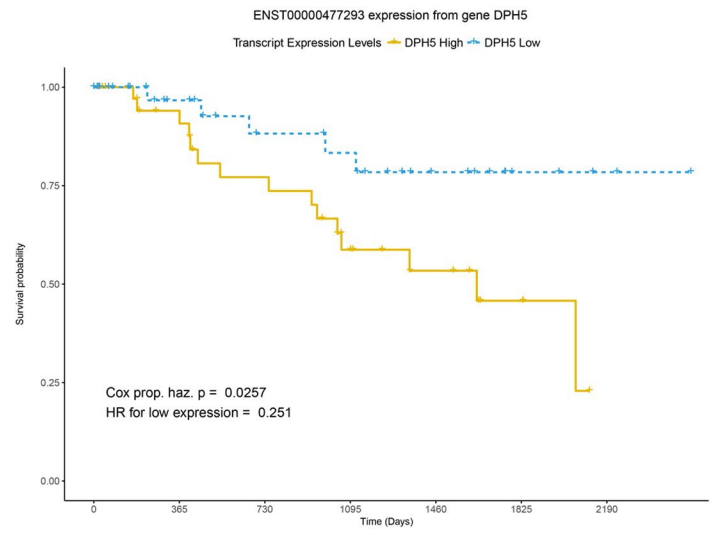**C**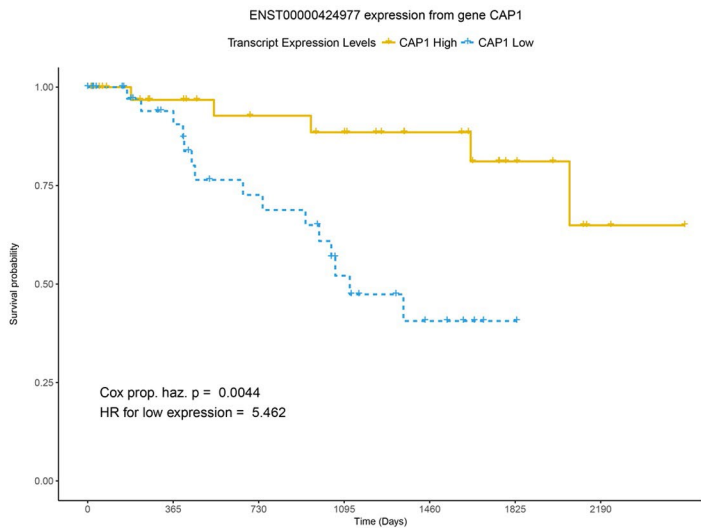**D**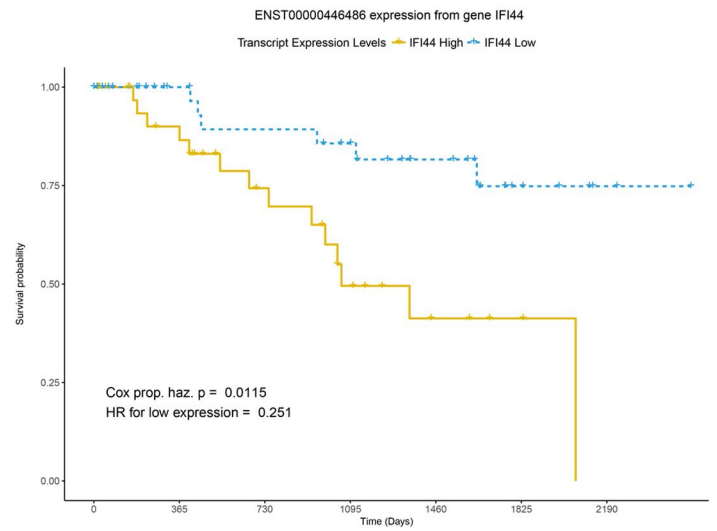**E**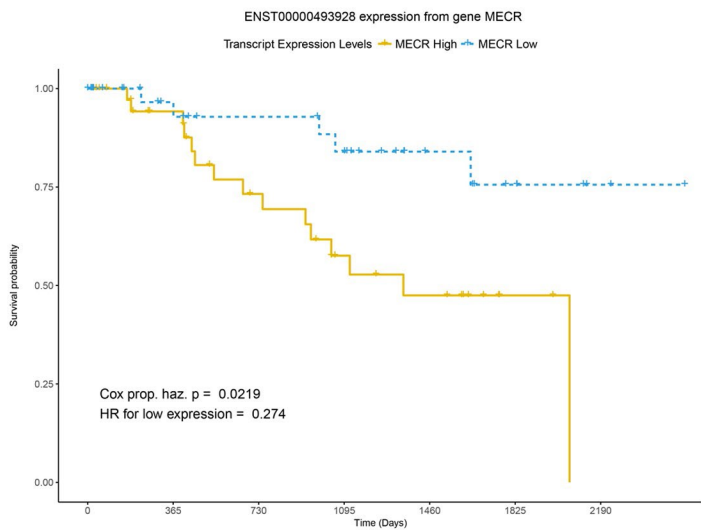**F**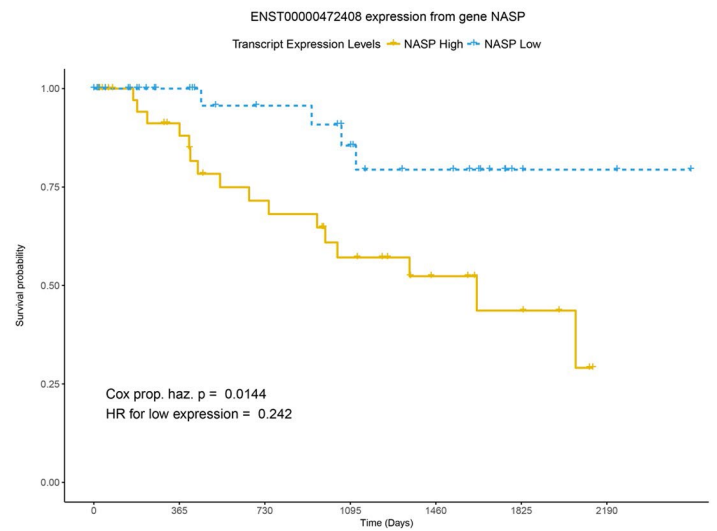



# Figure S8

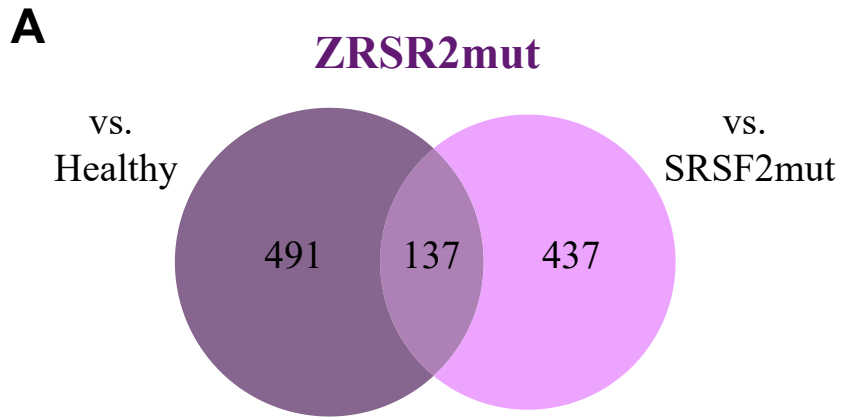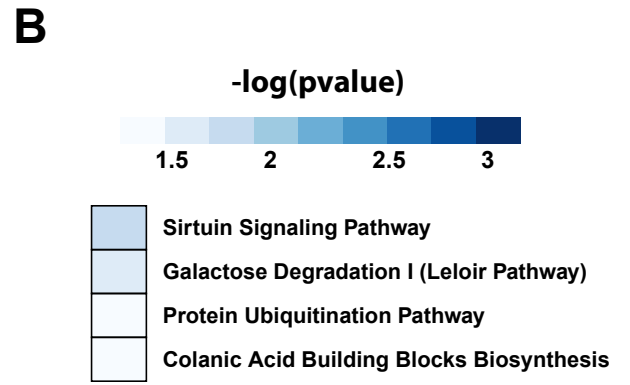

Figure S9

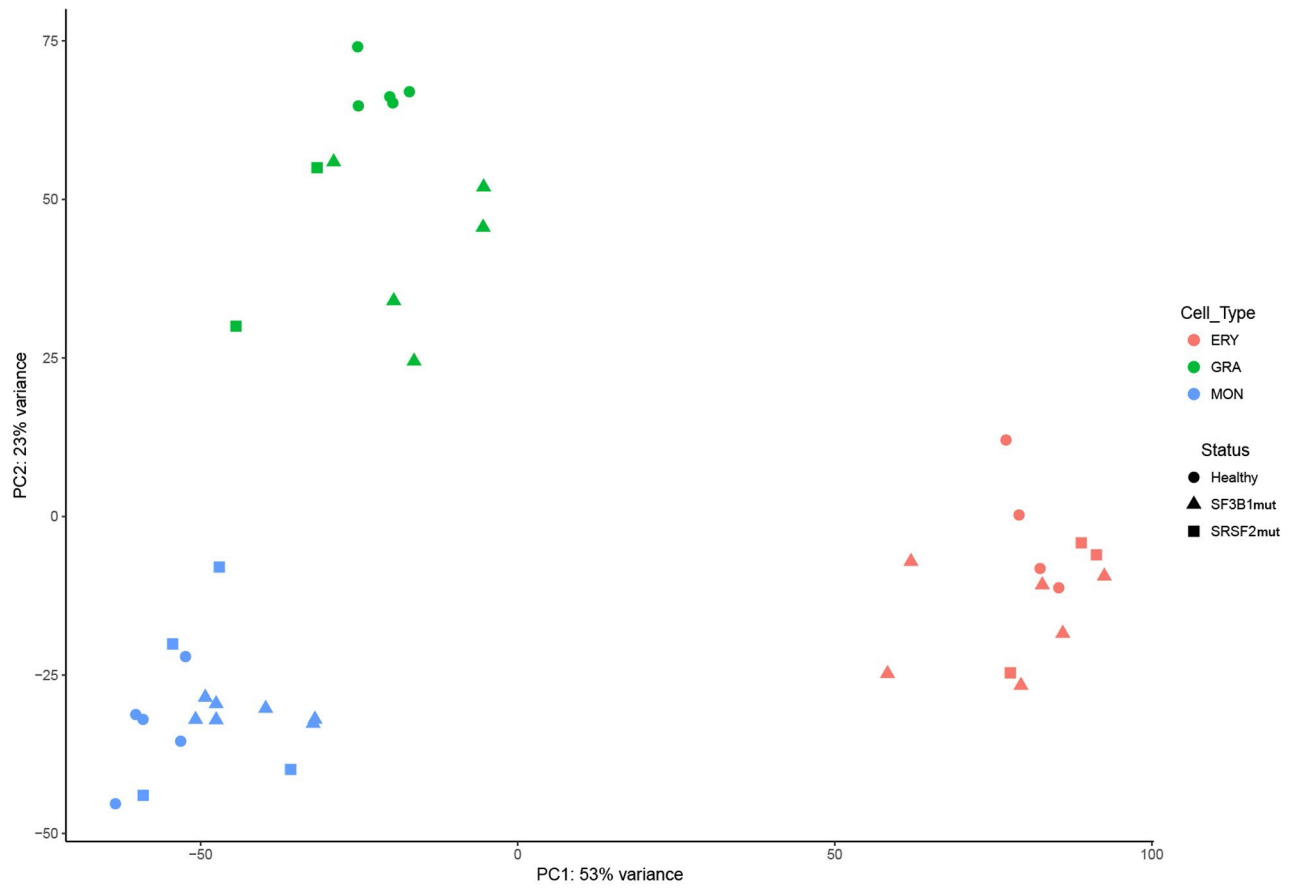

# Figure S10

## A

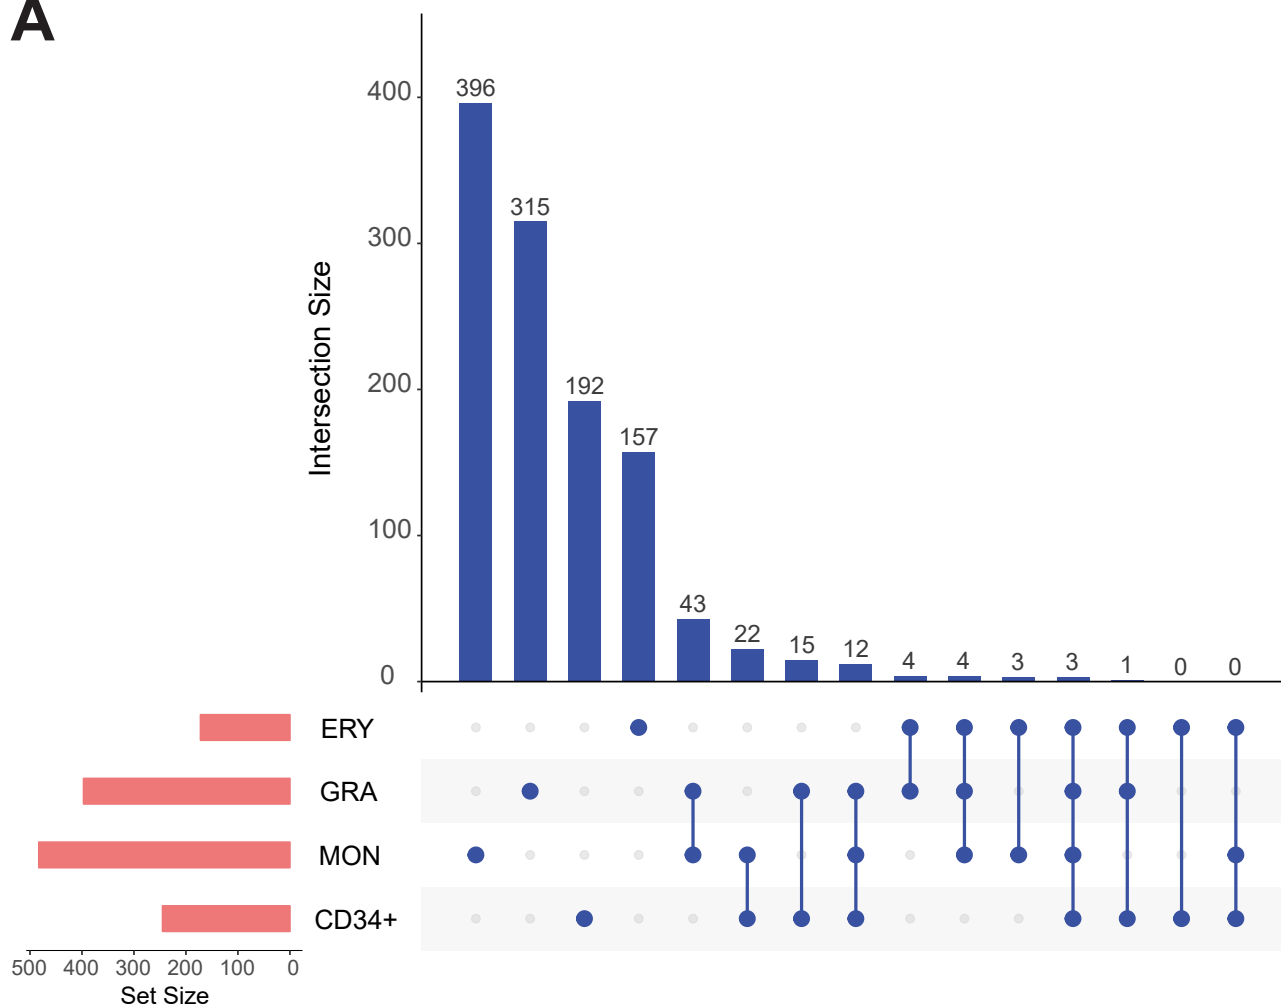

## B

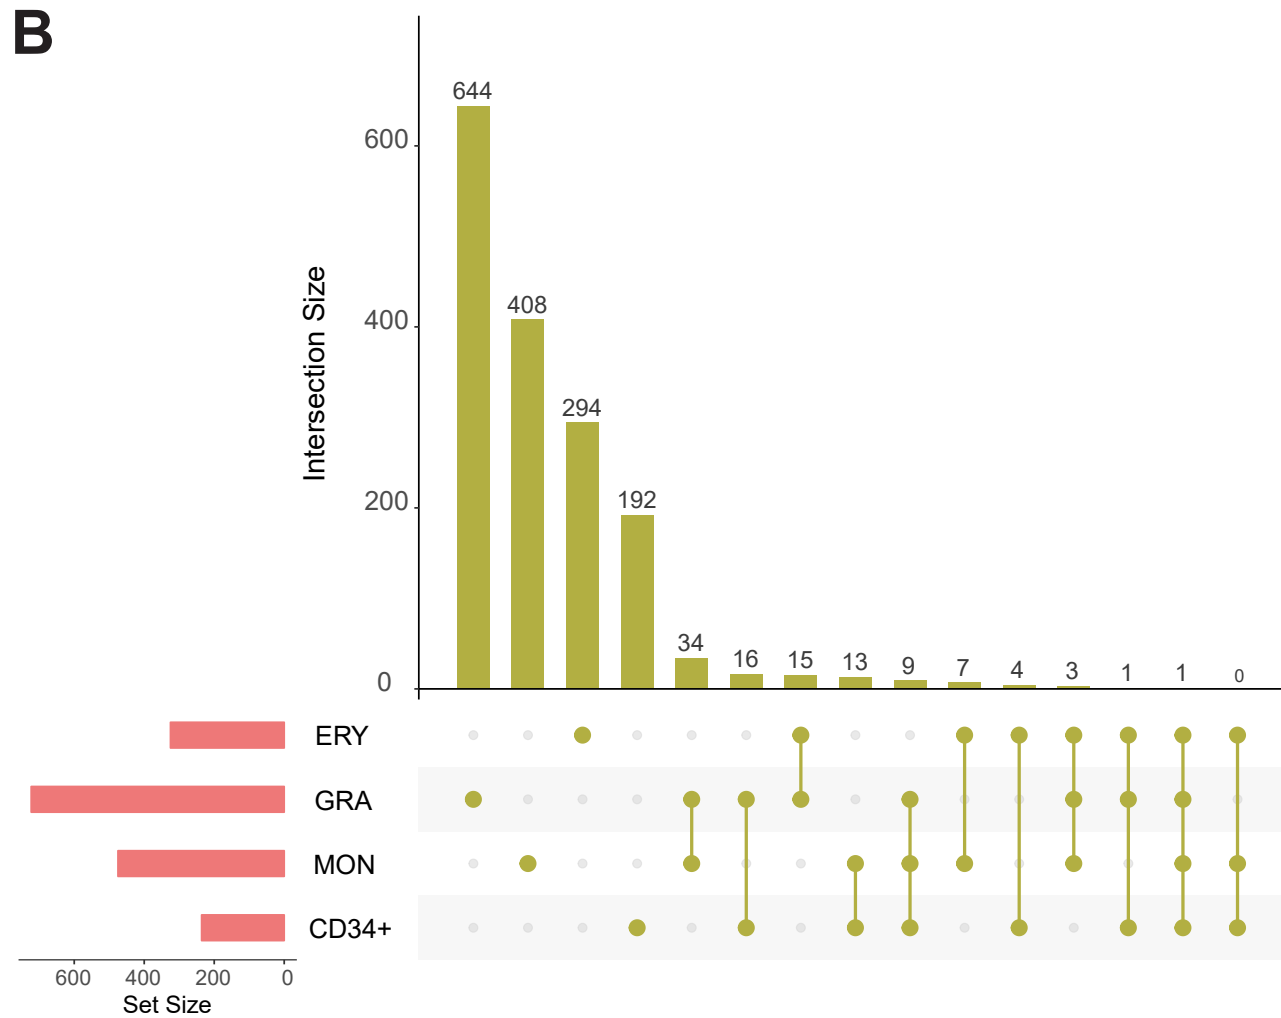

**Figure S11**

**A**

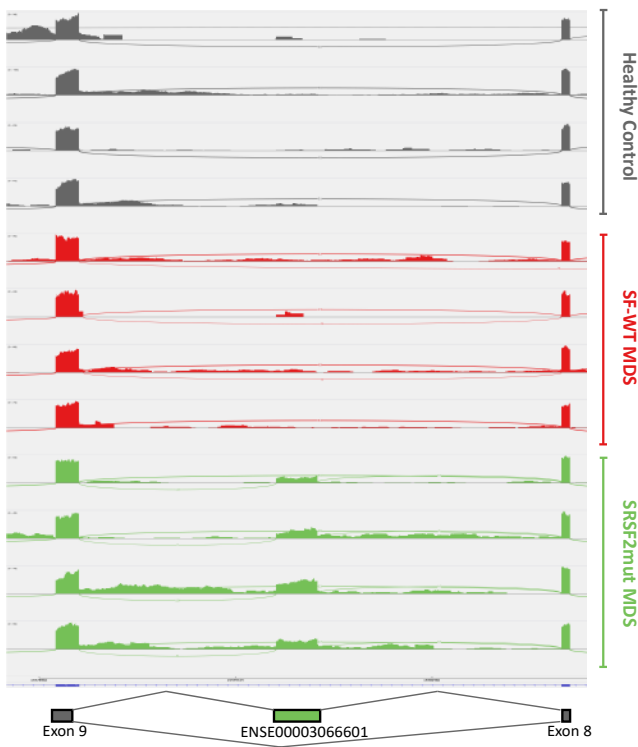

**B**

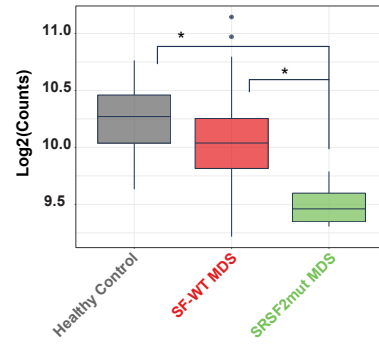

**C**

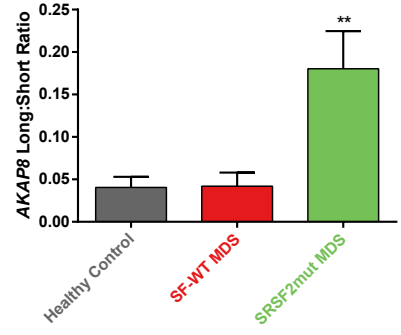

**D**

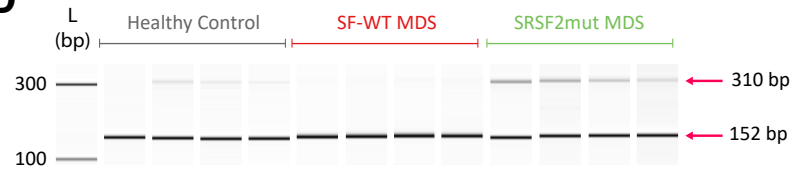

**E**

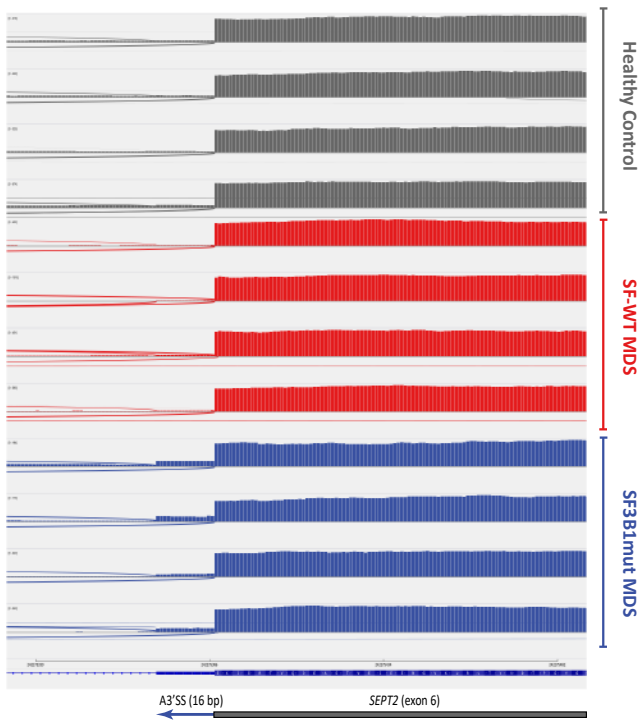

**F**

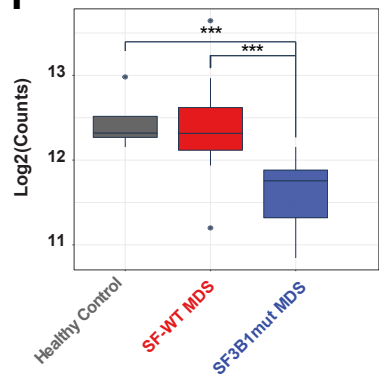

**G**

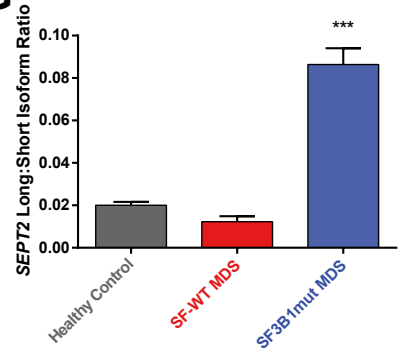

**H**

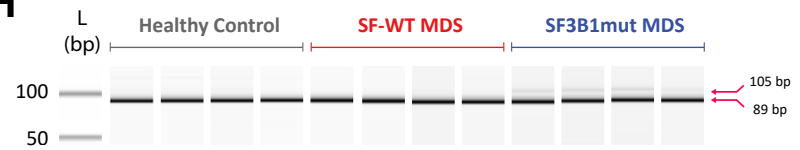

**I**

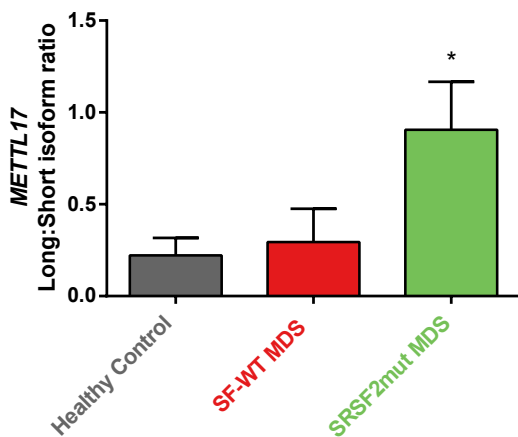

**J**

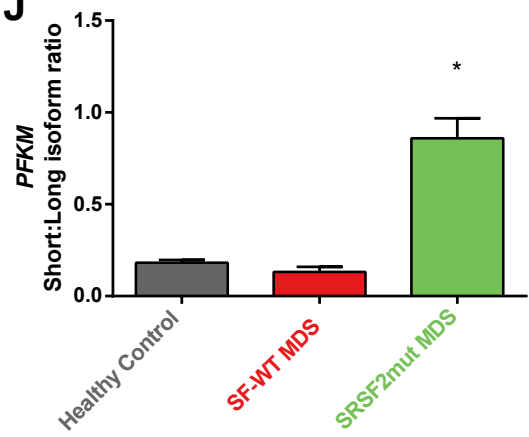

Supplement: blood843771-suppl1.pdf [file blood843771-suppl1.pdf]
